# Supplementary material
Source: PubMed Central journal article supplement (PMC2515625)

**Efficient Protodesilylation of Unactivated C(sp<sup>3</sup>)-SiMe<sub>2</sub>Ph Bonds using  
Tetrabutylammonium Fluoride**

Cheryl L. Heitzman, William T. Lambert, Eric Mertz, J. Brad Shotwell, Jennifer M. Tinsley,  
Porino Va and William R. Roush\*

Department of Chemistry, University of Michigan, Ann Arbor, MI, 48109-1055  
Email: roush@umich.edu

**Scanned Spectra to Accompany Supporting Information**

STANDARD 1H OBSERVE  
Pulse Sequence: s2pu1  
Solvent: CDCl3  
Ambient temperature  
INOVA-400 "Zr"  
PULSE SEQUENCE  
Pulse: 36.4 degrees  
Acq. time: 2.566 sec  
Width: 6000.6 Hz  
OBSERVED FID: 399.9649645 MHz  
DATA PROCESSING: 0.2 Hz  
Line broadening: 0.2 Hz  
FT size: 32768  
Total time: 0 min, 42 sec

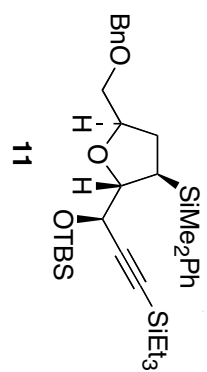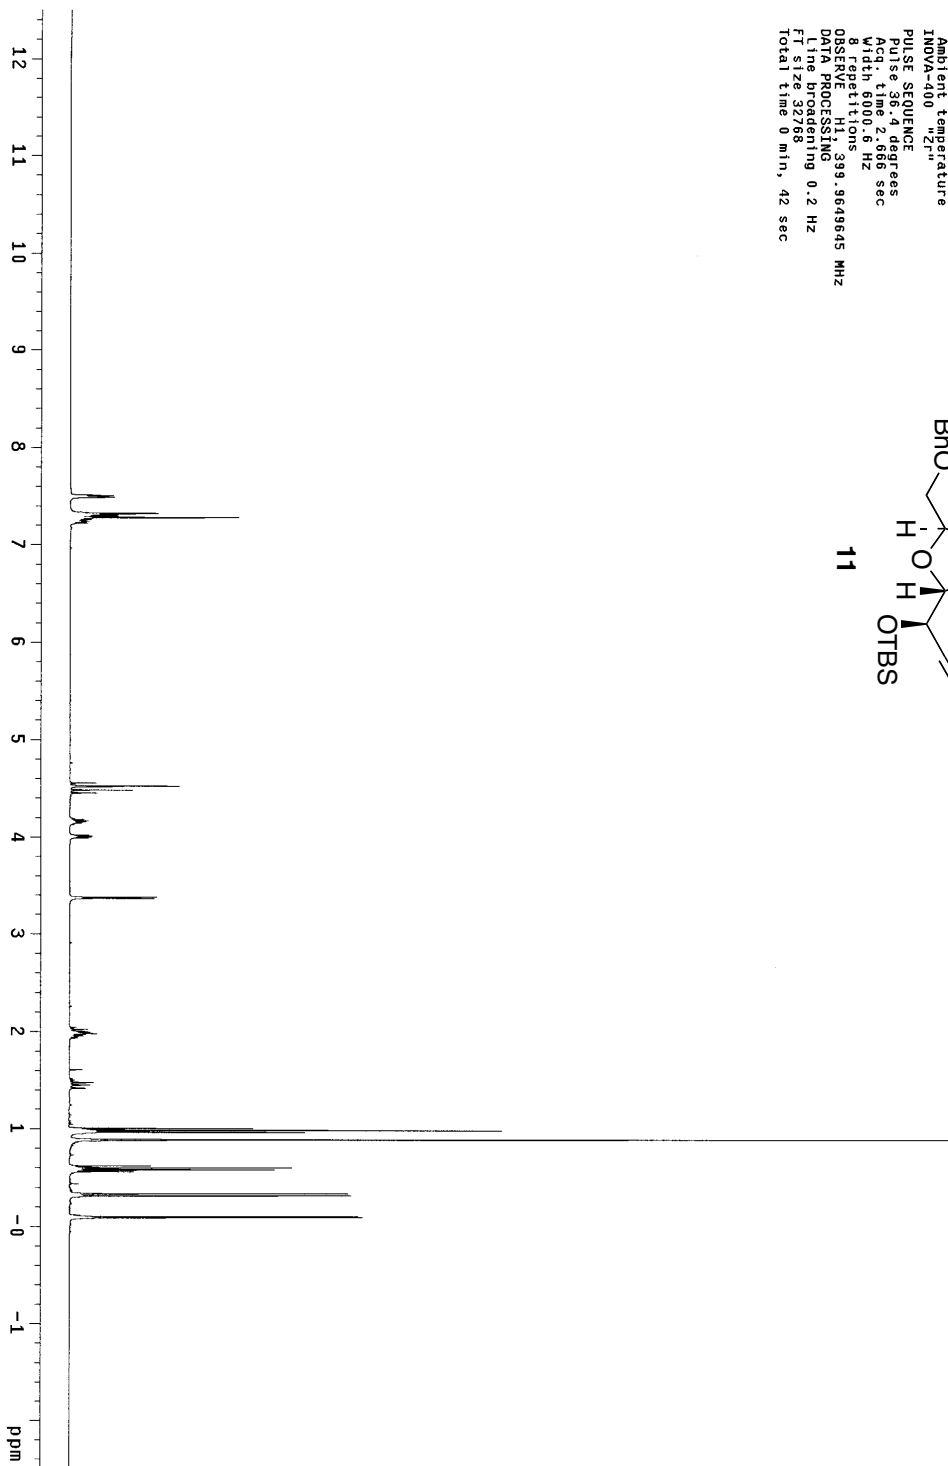

STANDARD PROTON PARAMETERS  
Pulse Sequence: szpu1  
Solvent: CDCl3  
Ambient temperature  
INDYA-500 "Sn"  
PULSE SEQUENCE  
Relax. delay 1.000 sec  
Pulse 45.0 degrees  
Acq. time 2.500 sec  
Width 8000.0 Hz  
8 Repetitions 499.9042558 MHz  
OBSERVED F1 F2  
FT size 65536  
Total time 0 min, 56 sec

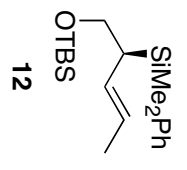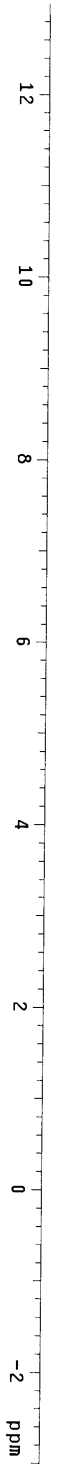

II-163

STANDARD PROTON PARAMETERS

Pulse Sequence: szpu1  
Solvent: CDCl3  
Ambient temperature  
INOVA-500 "Si"  
PULSE SEQUENCE  
R1: 1.000 sec  
Pulse: 20.8 degrees  
Acq. time: 2.500 sec  
Width: 3000.0 Hz  
16 repetitions  
OBSERVE H1: 499.3042558 MHz  
DATA PROCESSING  
F1 size: 65536  
Total time: 0 min, 56 sec

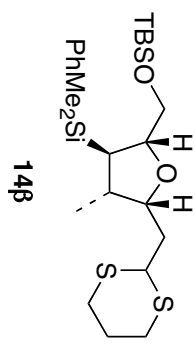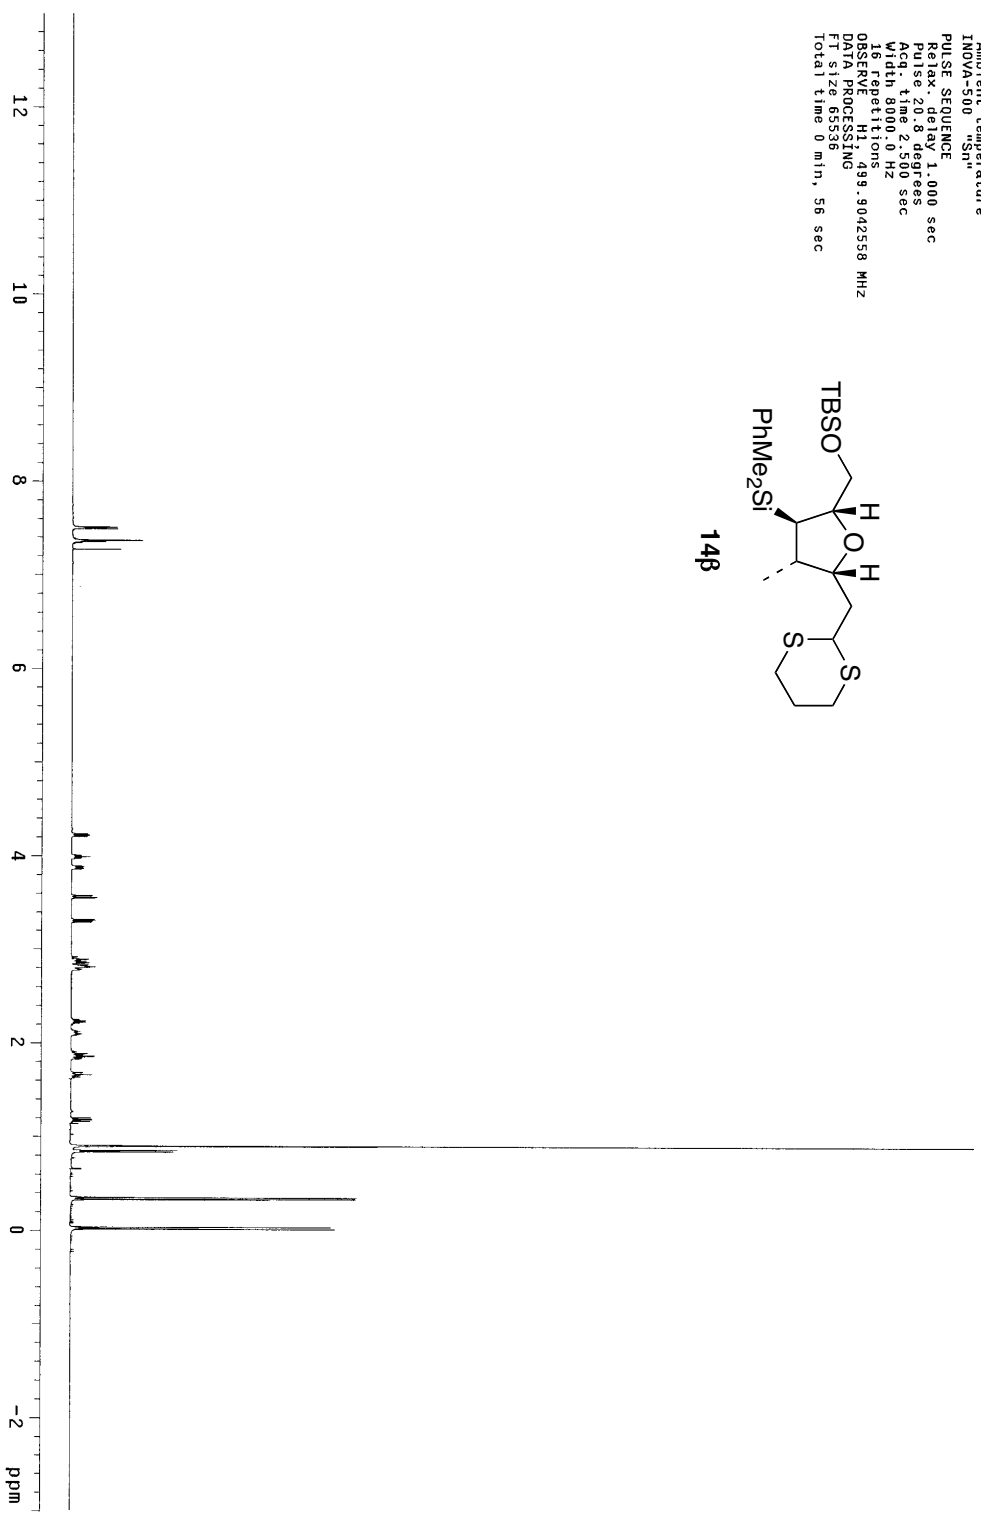

STANDARD PROTON PARAMETERS

Pulse Sequence: szpul  
 Solvent: CDCl3  
 Ambient temperature  
 INOVA-500 5H  
 PULSE SEQUENCE  
 Relax. delay 1.000 sec  
 Pulse 41.6 degrees  
 Width 800 Hz  
 16 repetitions  
 OBSERVE H1 499.9042555 MHz  
 DATA PROCESSING  
 FT size 65536  
 Total time 0 min, 56 sec

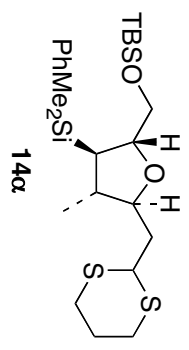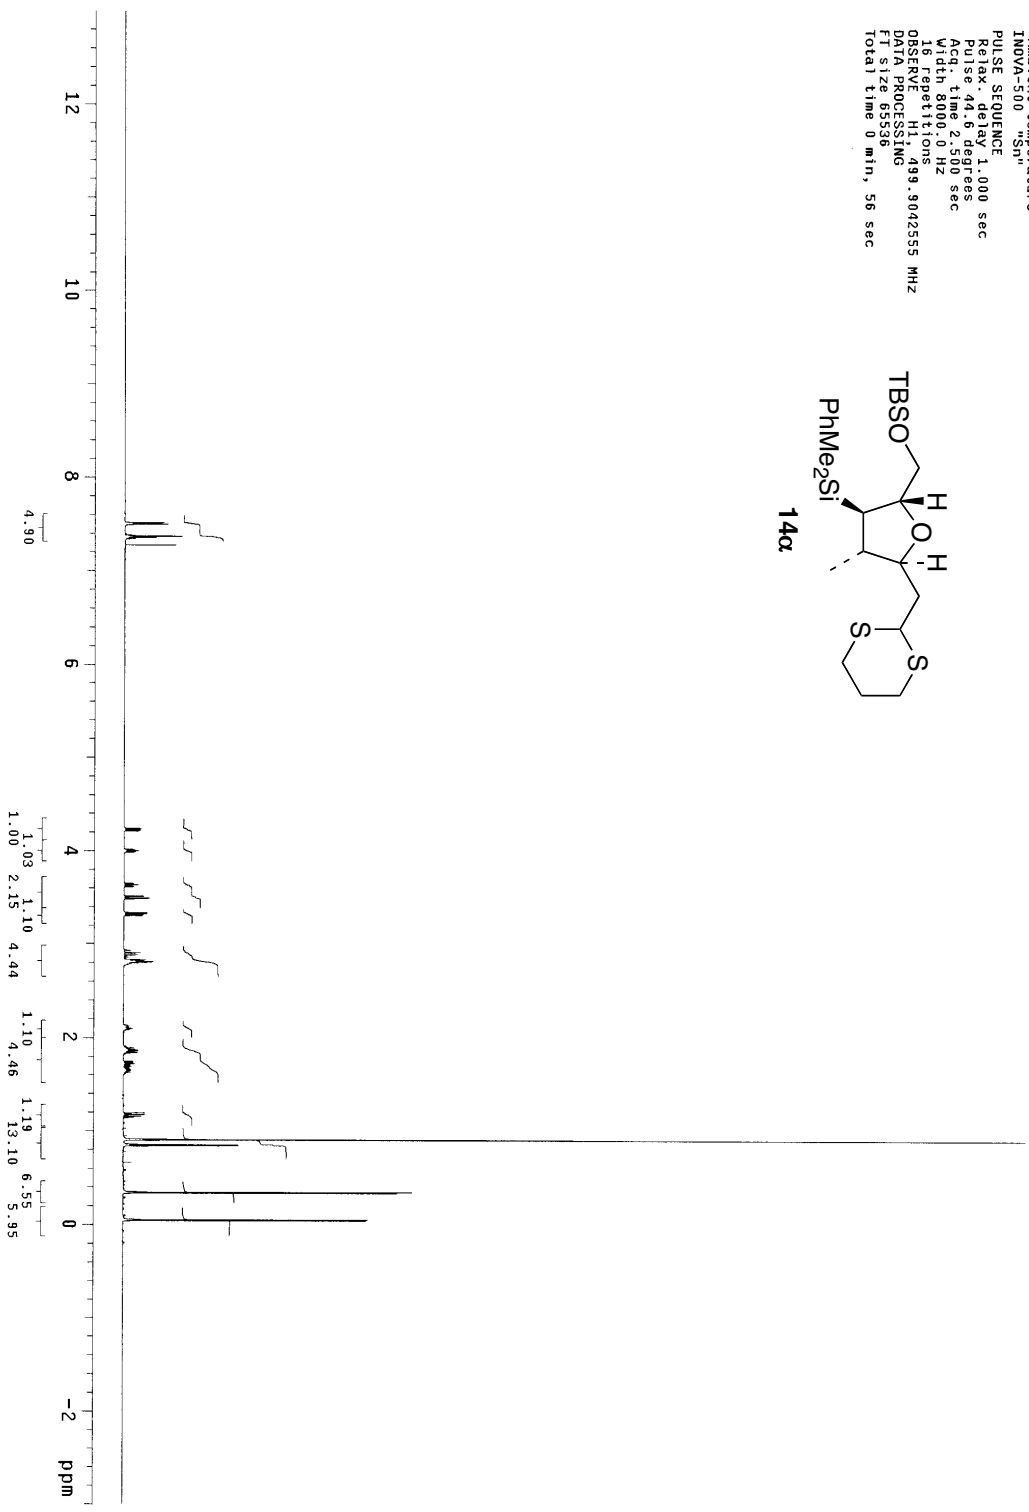

U-144

III-251

Jbs111-251on400MHz  
Pulse Sequence: s2pu1  
Solvent: CDCl3  
Ambient temperature  
File: Char111-251  
INOVA-500 <sup>13</sup>Cu  
PULSE SEQUENCE  
Pulse 45.0 degrees  
Acq. time 2.656 sec  
Width 6009.6 Hz  
Spectral width 9.9643447 MHz  
Observed H ions 43  
DATA PROCESSING  
Line broadening 0.2 Hz  
FT size 32768  
Total time 0 min, 42 sec

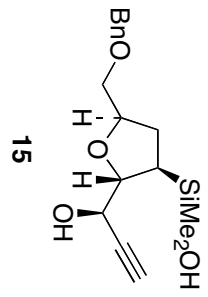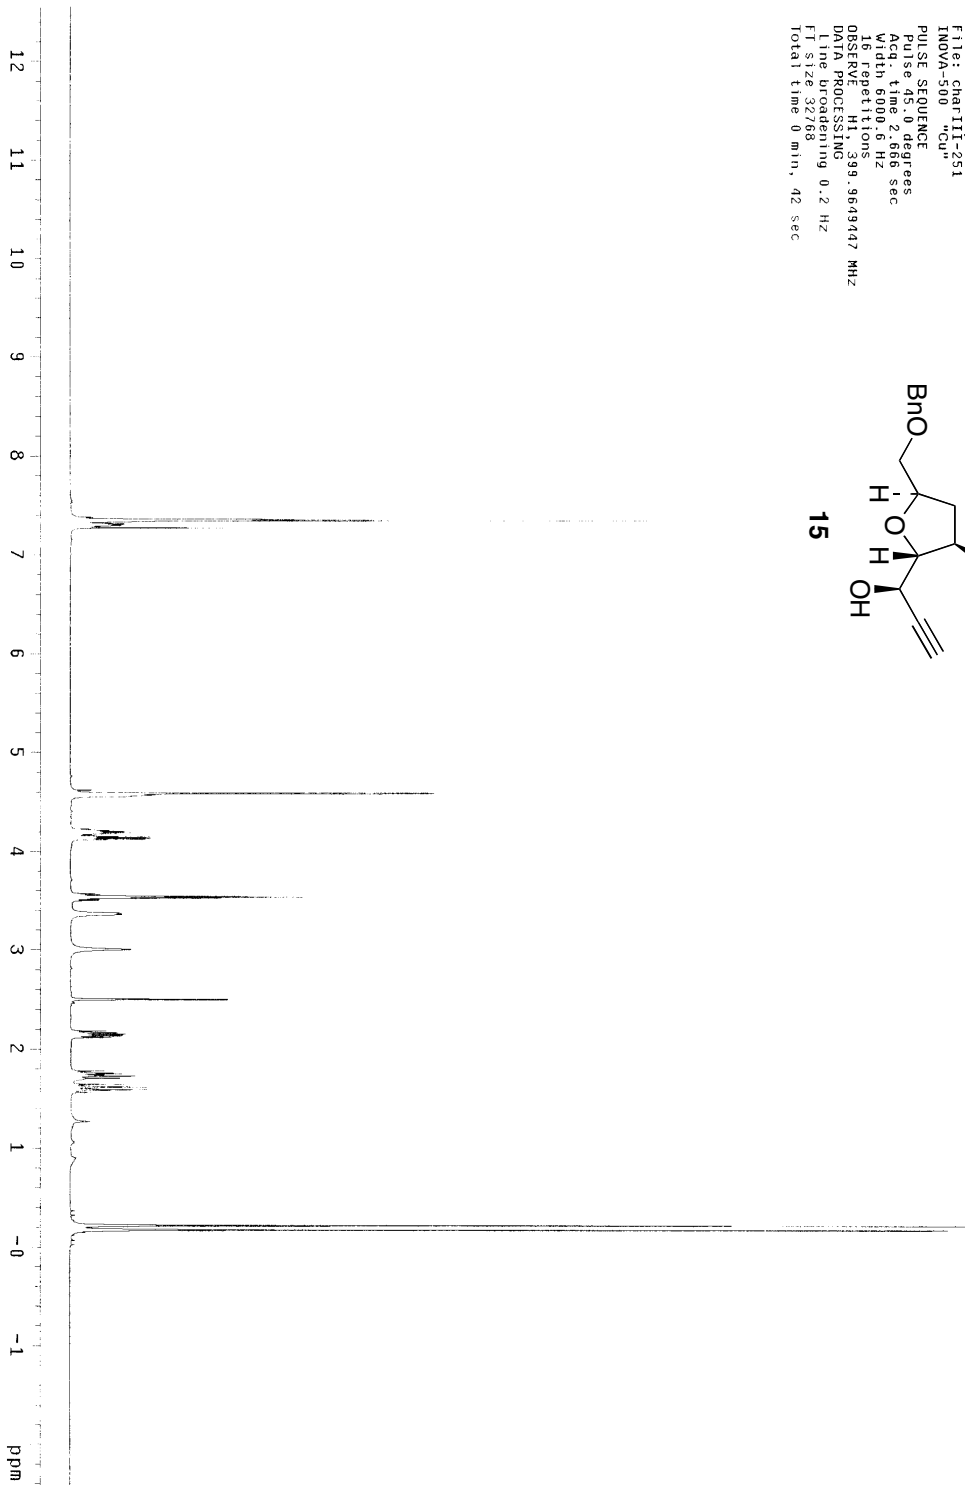

STANDARD PROTON PARAMETERS

Pulse Sequence: szpu1  
Solvent: CDCl3  
Acquire temperature: INOVA-500  
PULSE SEQUENCE: 1, 000 sec  
Pulse sequence: 45.00 sec  
Acq. time: 2.500 sec  
Width: 8000.0 Hz  
8 repetitions  
OBSERVE: H1, 499.9042537 MHz  
DATA PROCESSING  
F1 size: 85536  
Total time: 0 min, 56 sec

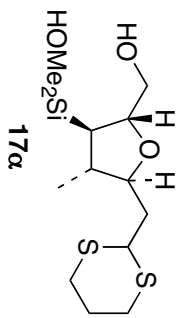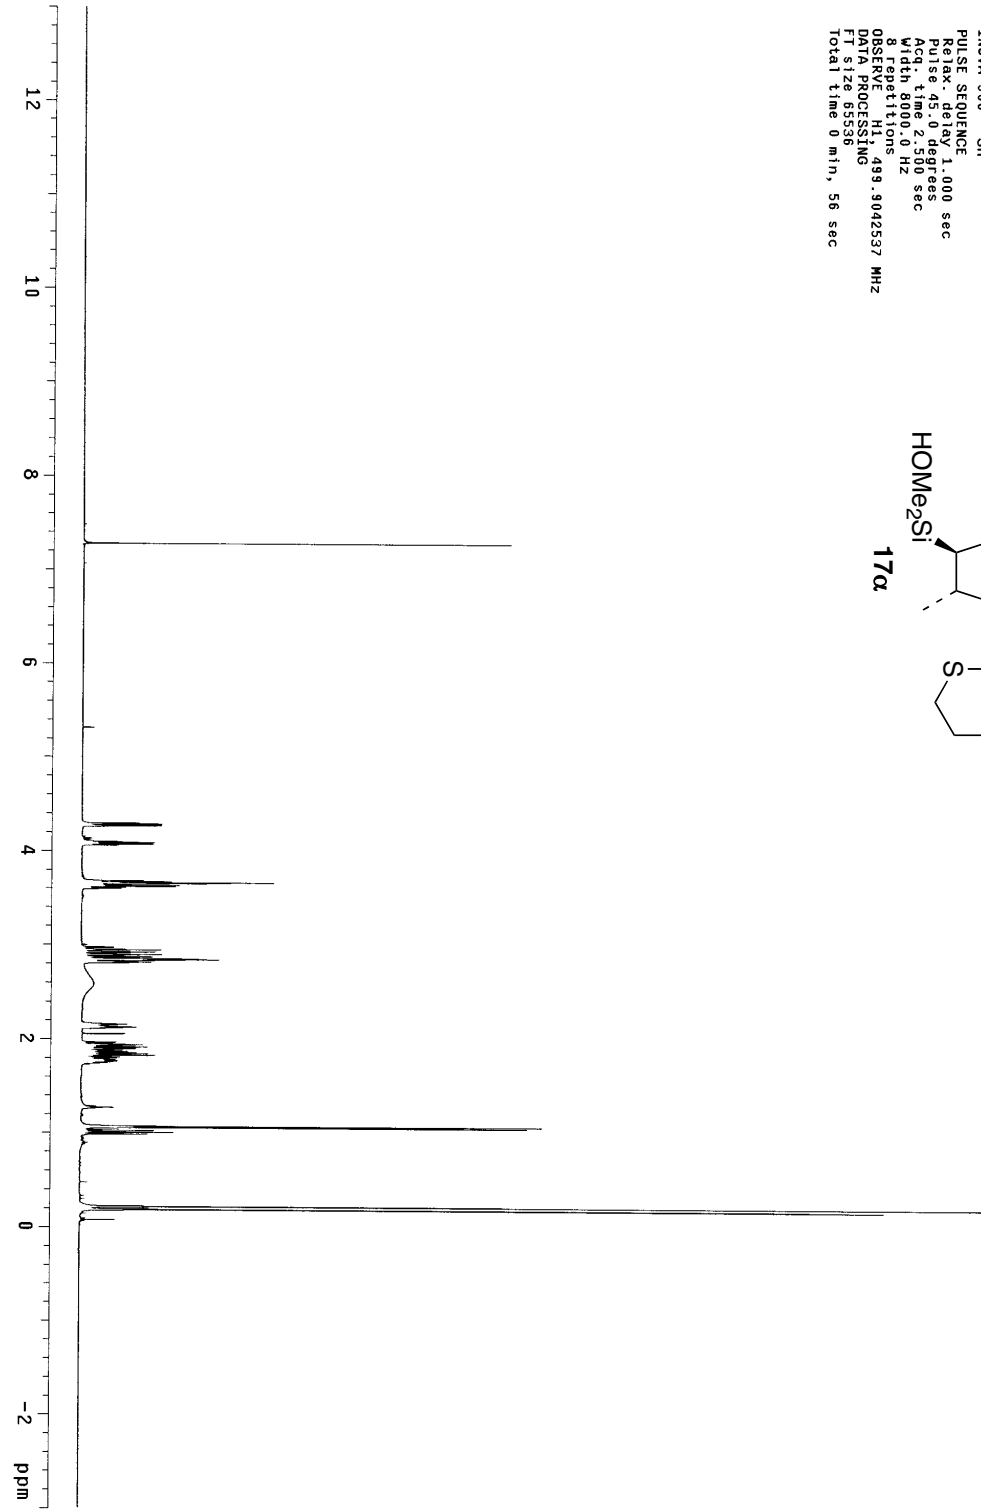

STANDARD PROTON PARAMETERS

Pulse Sequence: s2pul  
Solvent: CDCl3  
Ambient temperature  
INOVA-500 MHz  
PULSE SEQUENCE  
Relax. delay 1.000 sec  
Pulse 45.0 degrees  
Width 3000.0 Hz  
8 Repetitions  
OBSERVE H1, 499.9042537 MHz  
DATA PROCESSING  
FT size 65536  
Total time 0 min, 56 sec

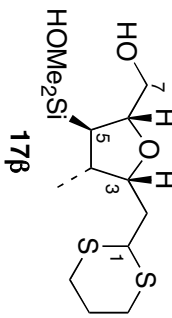

**II-269**

Ca 1:1

*dimethyl Novec*

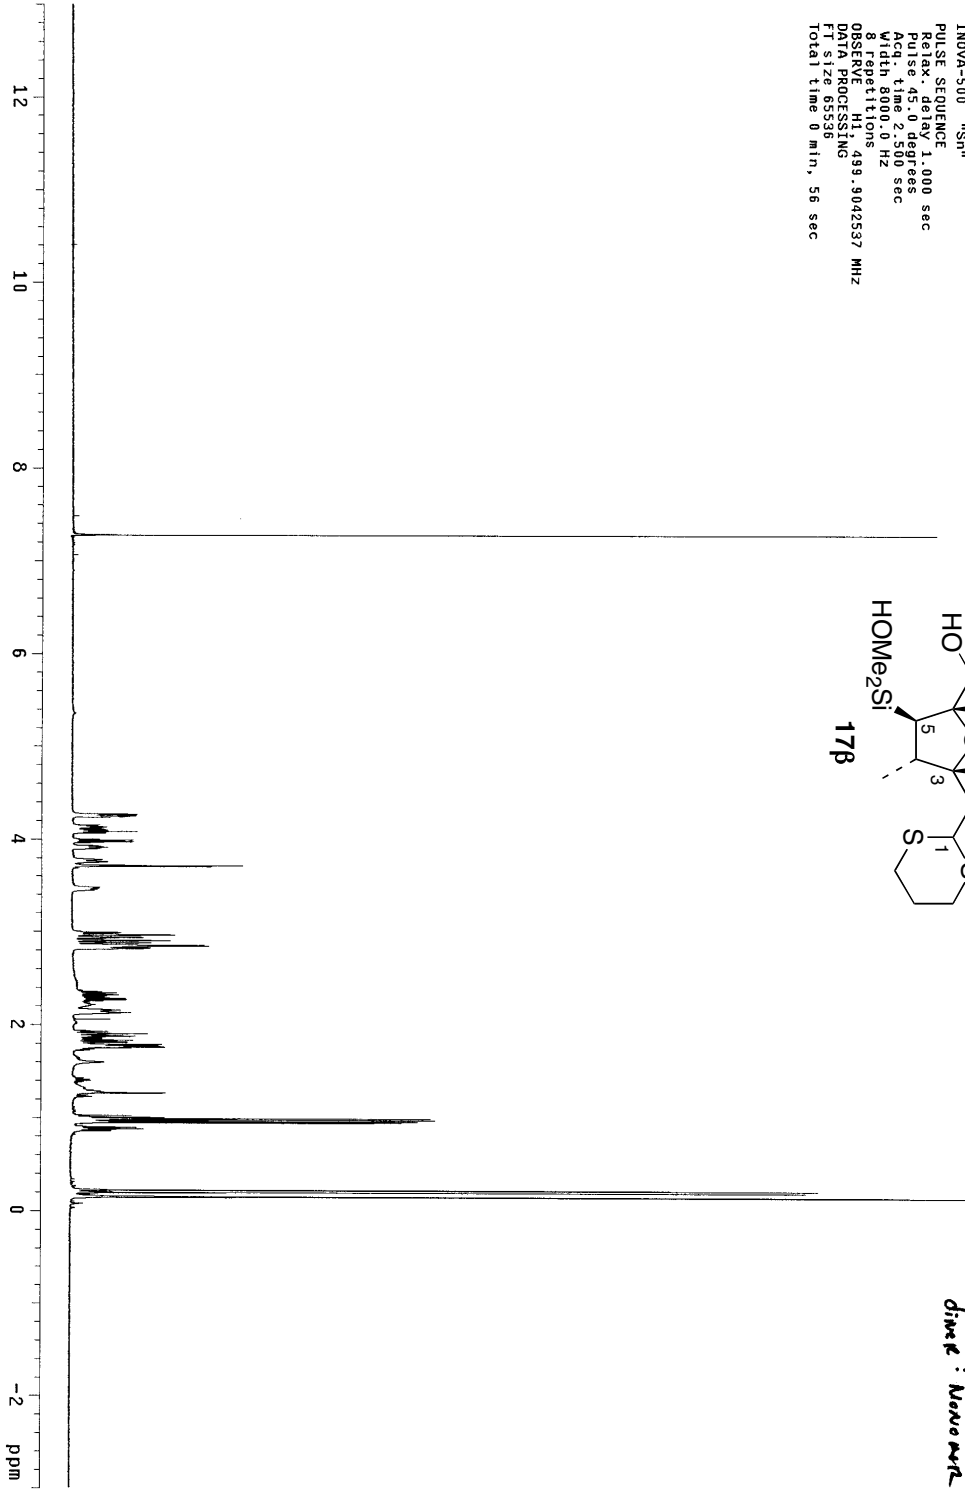



STANDARD 1H OBSERVE

Pulse Sequence: sZpu1  
 Solvent: CDCl3  
 Ambient Temperature  
 INOVA-400 "Zr"  
 PULSE SEQUENCE  
 Pulse: 38.4 degrees  
 Acq. time: 2.666 sec  
 Width: 6000.6 Hz  
 Offset: 100.625 MHz  
 Observed: 99.9649645 MHz  
 DATA PROCESSING  
 Line broadening: 0.2 Hz  
 FI size: 32768  
 Total time: 0 min, 42 sec

306 III - 2 7

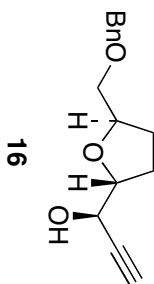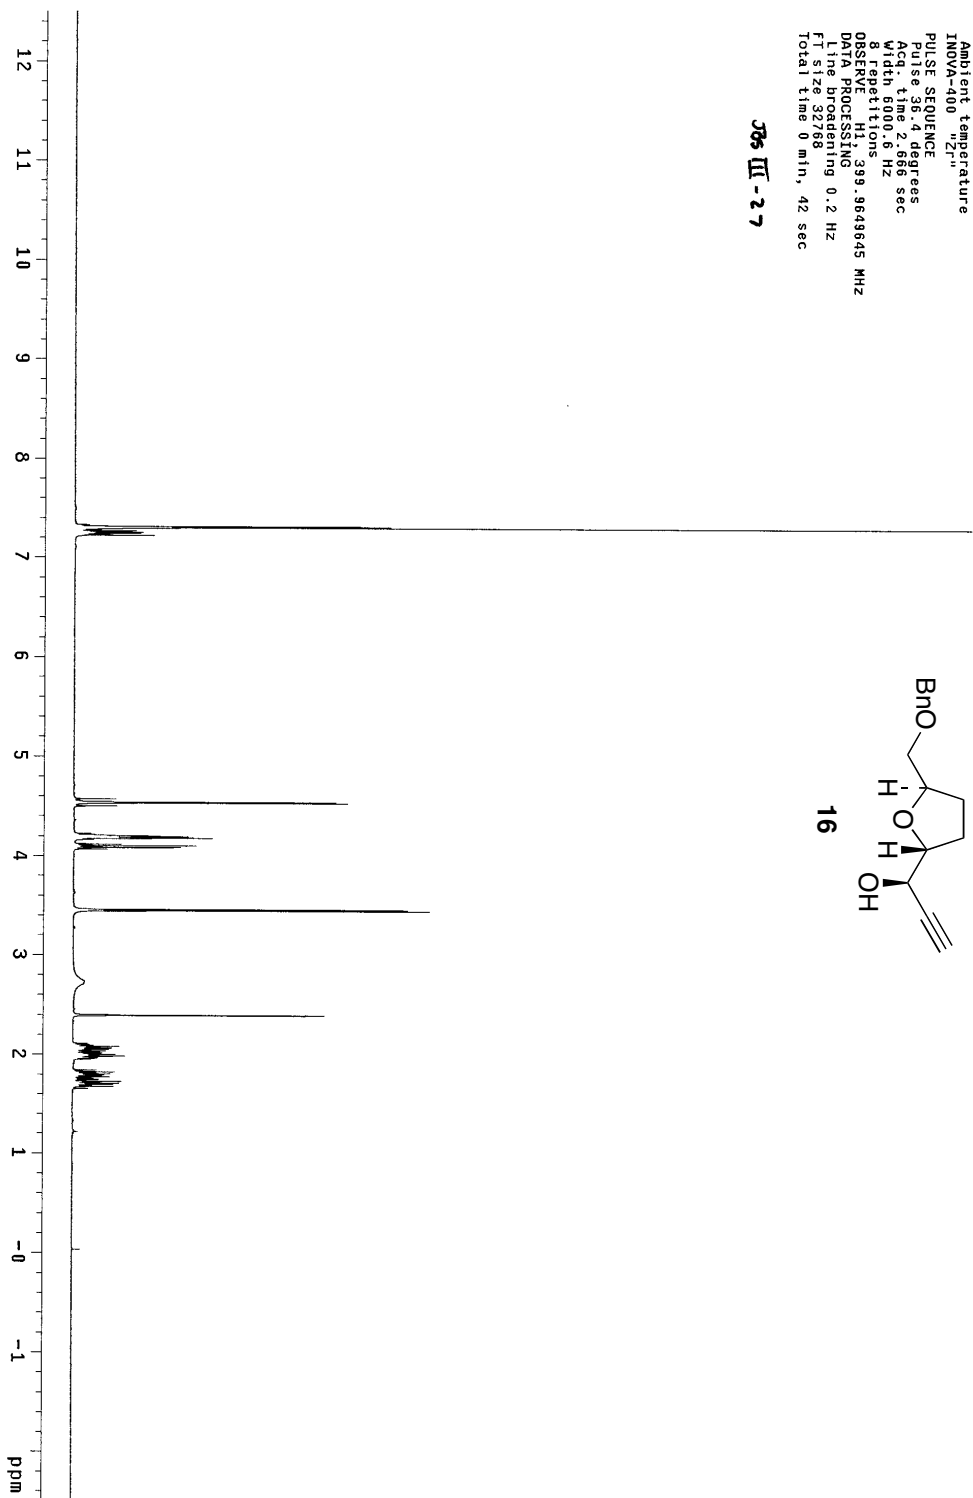

II-130

STANDARD PROTON PARAMETERS

Pulse Sequence: szpu1  
Solvent: CDCl3  
Ambient temperature  
INOVA-500 "5H"  
PULSE SEQUENCE  
Relax. delay 1.000 sec  
Pulse 49.6 degrees  
Acq. time 2.500 sec  
16  
15  
OBSERVE: H1 on 499.9042537 MHz  
DATA PROCESSING  
FT size 65536  
Total time 0 min, 56 sec

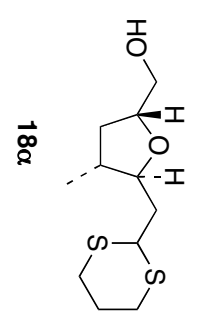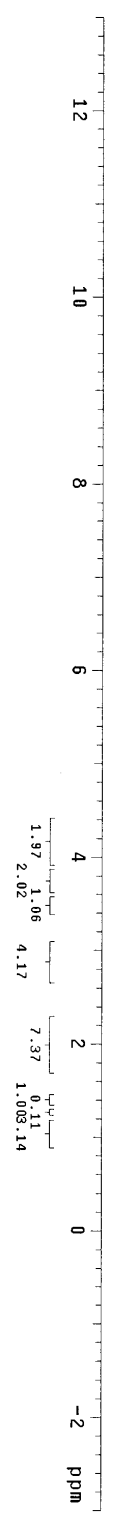

STANDARD PROTON PARAMETERS

Pulse Sequence: szpu1  
Solvent: CDCl3  
Ambient temperature  
INOVA-500 130MHz  
PULSE SEQUENCE  
Relax. delay 1.000 sec  
Pulse 41.6 degrees  
Acq. time 4.500 sec  
Width 800 Hz  
16 repetitions  
OBSERVE H1: 499.9042555 MHz  
DATA PROCESSING  
FT size 65536  
Total time 0 min, 56 sec

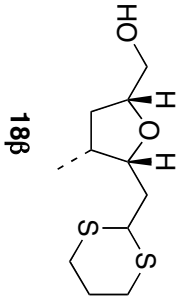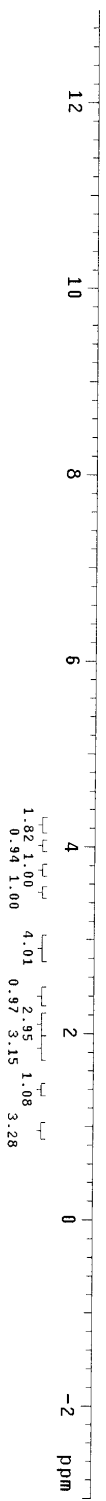

STANDARD 1H OBSERVE

Pulse Sequence: s2pu1  
Solvent: CDCl3  
Ambient temperature  
INOVA-400 "Zr"  
PULSE SEQUENCE  
Pulse 35.0 degrees  
Acq. time 2.666 sec  
Width 6000.6 Hz  
OBSERVE H1 399.9649645 MHz  
DATA PROCESSING  
Line broadening 0.2 Hz  
FT size 32768  
Total time 0 min, 42 sec

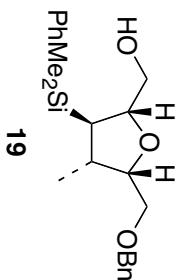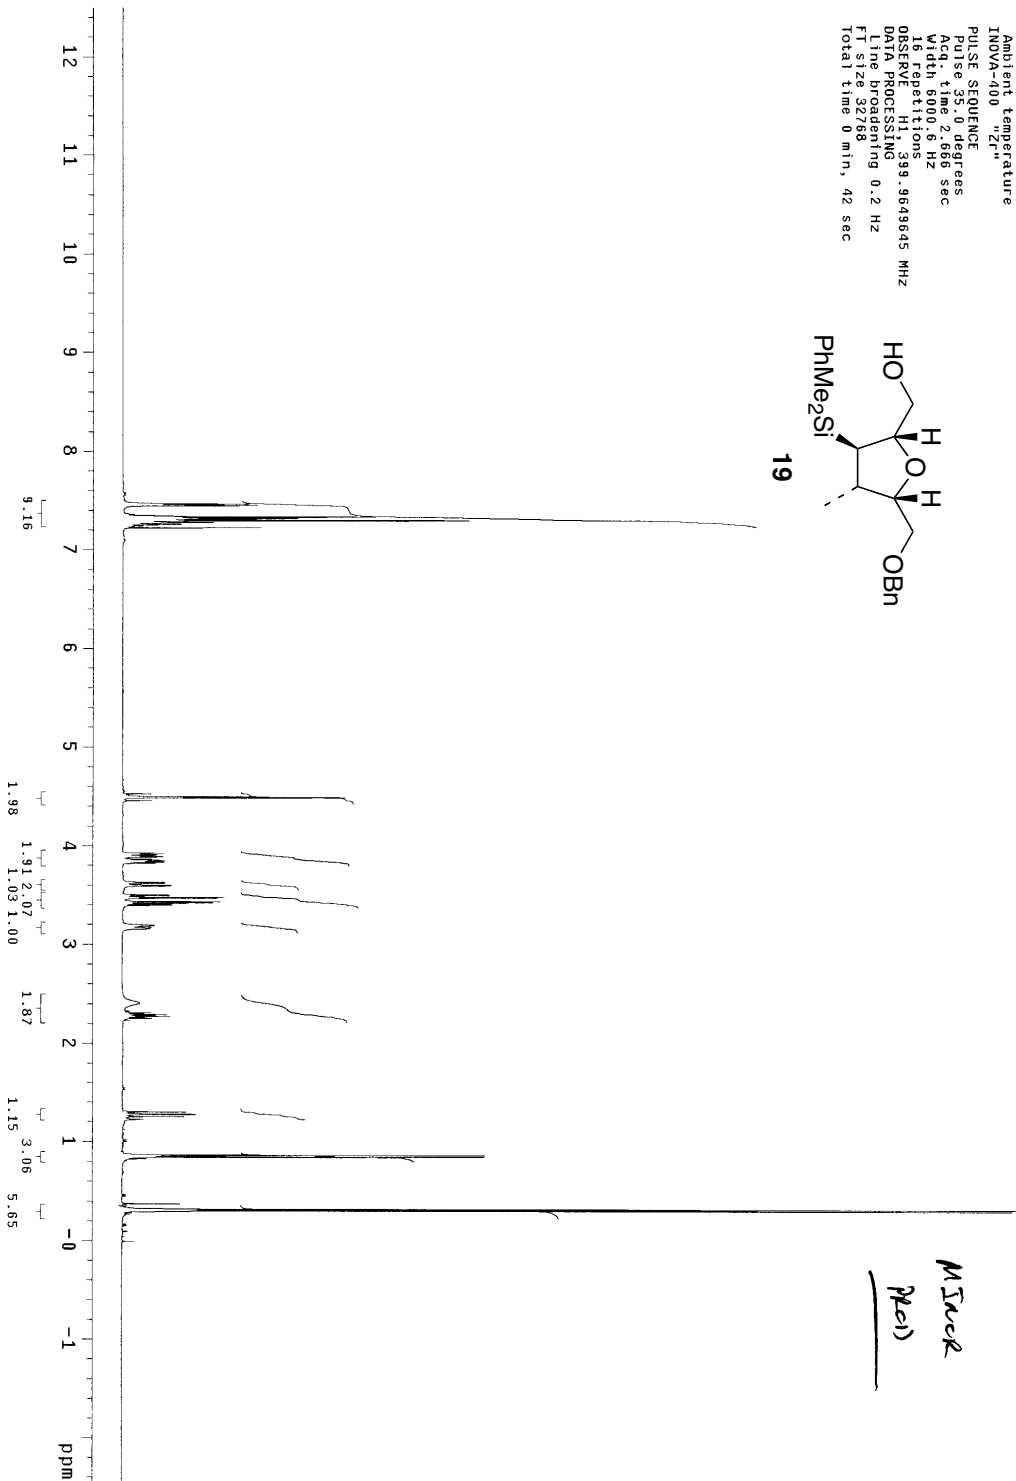

II-55

Mack

Med

STANDARD PROTON PARAMETERS

Pulse Sequence: s2pu1  
Solvent: CDCl3  
Temp: 23.0 C / 296.1 K  
INOVA-500 "Srf"  
PULSE SEQUENCE  
Relax. delay: 1.000 sec  
Pulse: 45.0 degrees  
Acq. time: 2.500 sec  
Width: 8000.0 Hz  
8 Repetitions: 499.9042537 MHz  
OBSERVED F1: 99.9042537 MHz  
P1: 12.00000000 sec  
P1 size: 65536  
Total time: 0 min, 56 sec

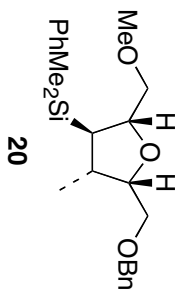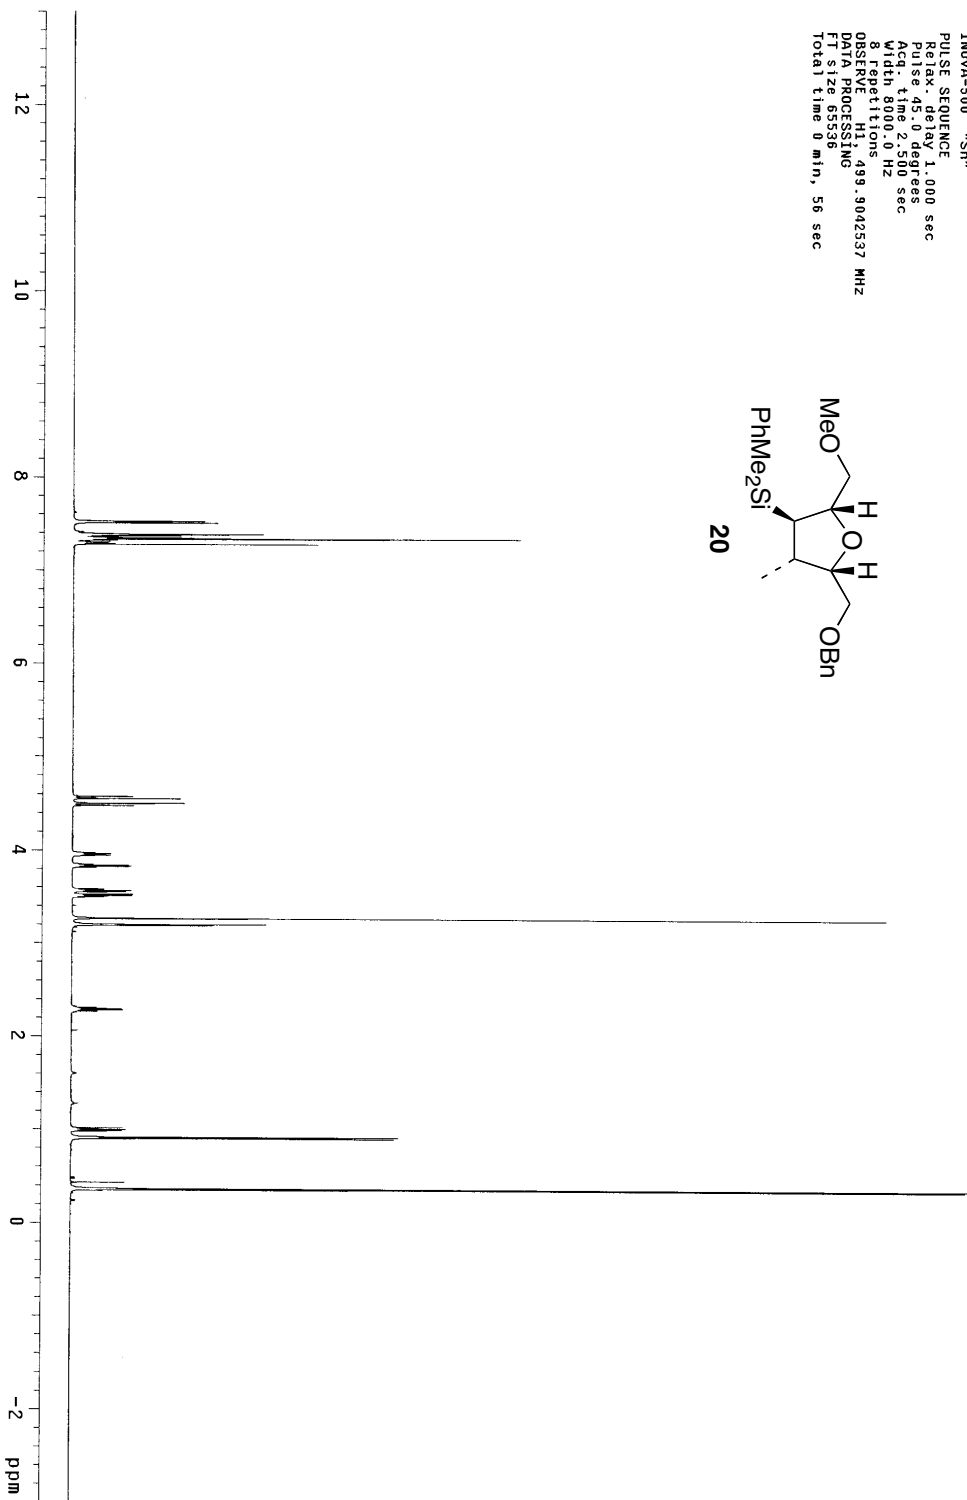

STANDARD 1H OBSERVE

Pulse Sequence: s2pu1  
Solvent: CDCl3  
Ambient temperature  
INOVA-400 "ZPL"  
PULSE SEQUENCE  
Pulse 45.0 degrees  
Acq. time 2.665 sec  
8  
P1 len 8900.8 Hz  
OBSERVE: H1 399.9649645 MHz  
DATA PROCESSING  
Line broadening 0.2 Hz  
FT size 32768  
Total time 0 min, 42 sec

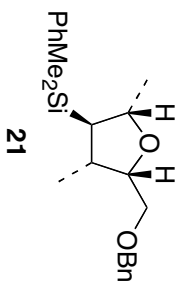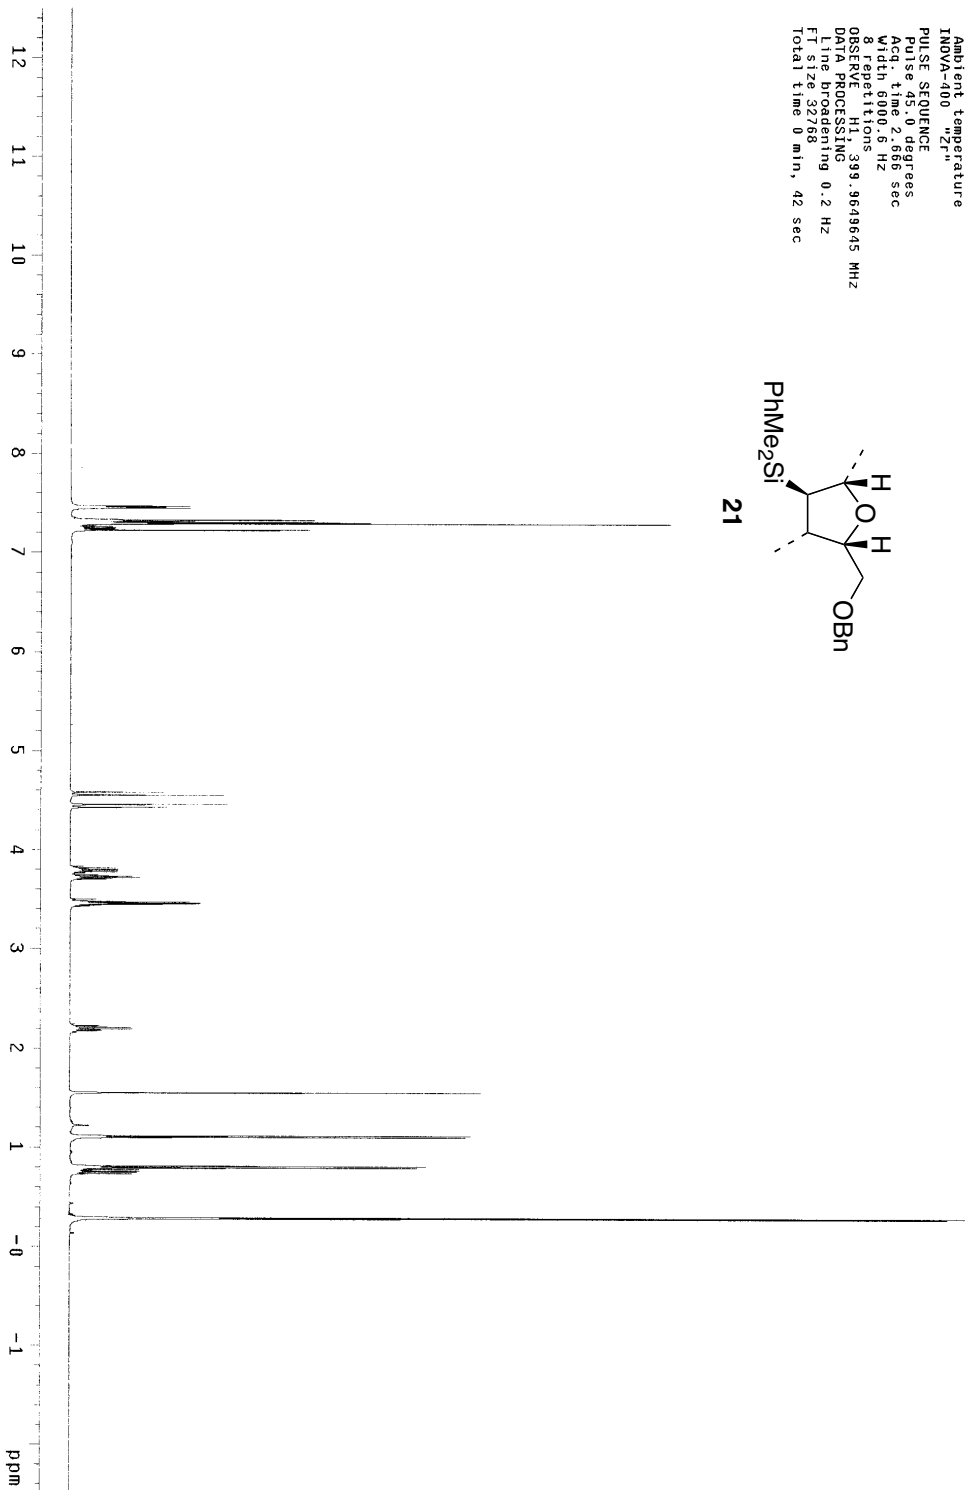

HPLC

STANDARD PROTON PARAMETERS

Pulse Sequence: s2pu1  
Solvent: CDCl3  
Temp: 23.0 C / 296.1 K  
INOVA-500 "1H"  
PULSE SEQUENCE:  
Relax: delay 1.000 sec  
Pulse: 45.0 degrees  
Acq: time 2.500 sec  
SFO: 300.0 Hz  
NUC1: 1H  
OBSERVE: 1H  
P1: 12.00  
PR: 1.00  
DATA PROCESSING  
FT size 65536  
Total time 0 min, 56 sec

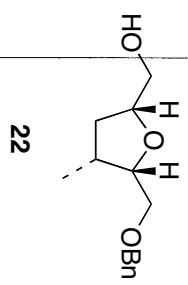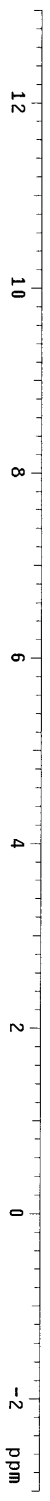

STANDARD 1H OBSERVE

Pulse Sequence: szpu1  
Solvent: CDCl3  
Acquisition Temperature: 300.2 K  
INOVA-400  
PULSE SEQUENCE  
Pulse 1: 2.0000000000000000 sec  
Acquisition: 2.0000000000000000 sec  
Width: 6000.6 Hz  
16 repetitions  
OBSERVE: H1, 399.9649645 MHz  
DATA PROCESSING  
Line broadening: 0.2 Hz  
FT size: 32788  
Total time: 0 min, 42 sec

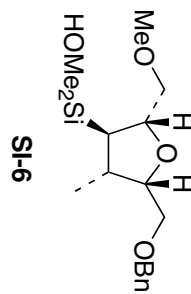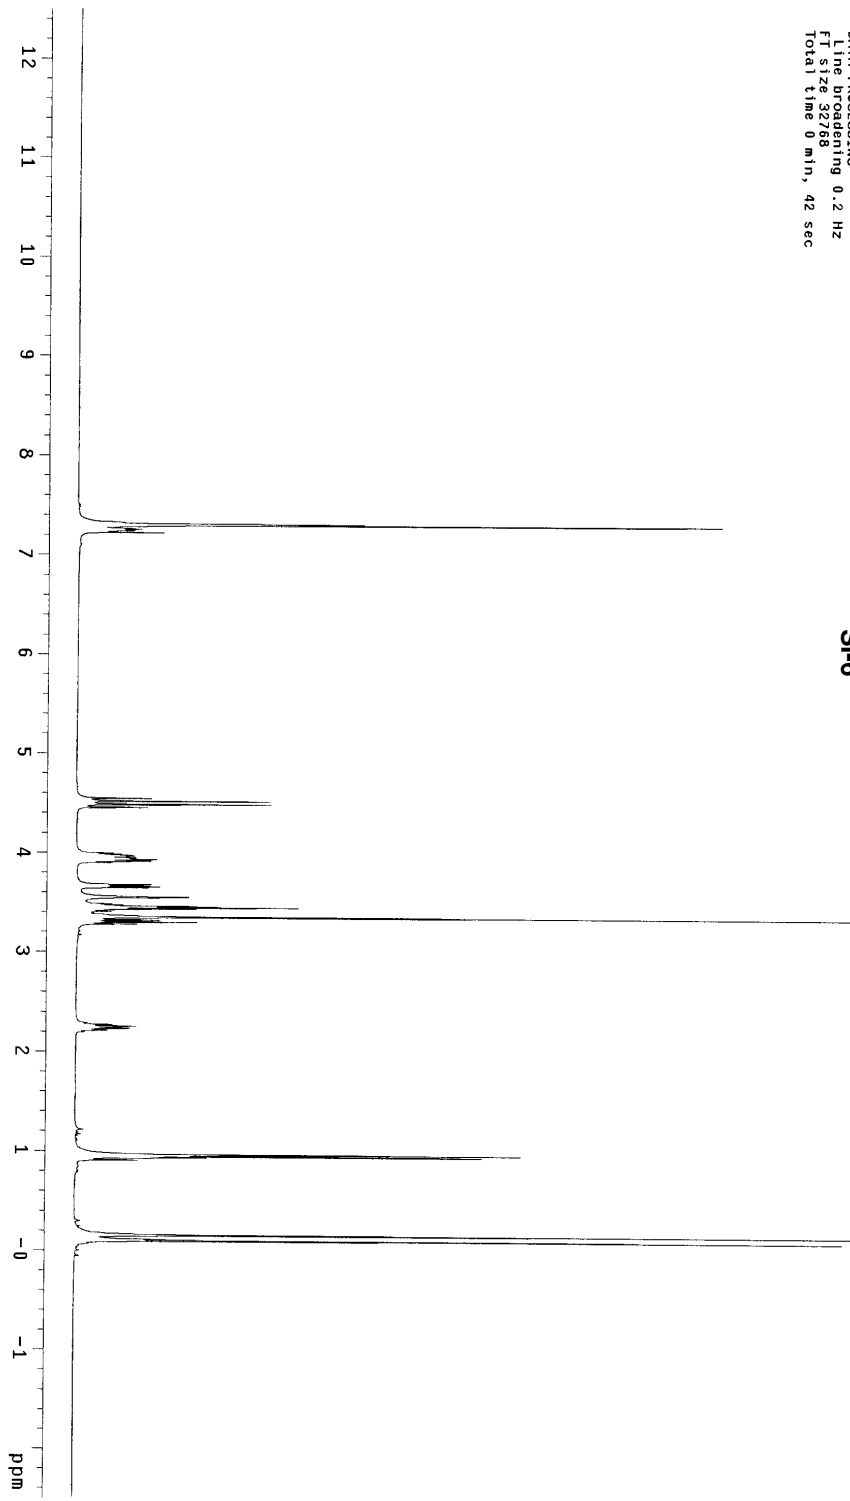



STANDARD PROTON PARAMETERS

Pulse Sequence: szpul  
Solvent: CDCl3  
Temp: 23.0 C / 296.1 K  
INOVA-500 5H  
PULSE SEQUENCE  
Relax: delay 1.000 sec  
Pulse: 49.0 degrees  
Width: 8000.0 Hz  
16 repetitions  
OBSERVE: H1, 499.902555 MHz  
DATA PROCESSING  
FT: size 65536  
Total time 0 min, 56 sec

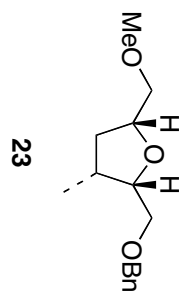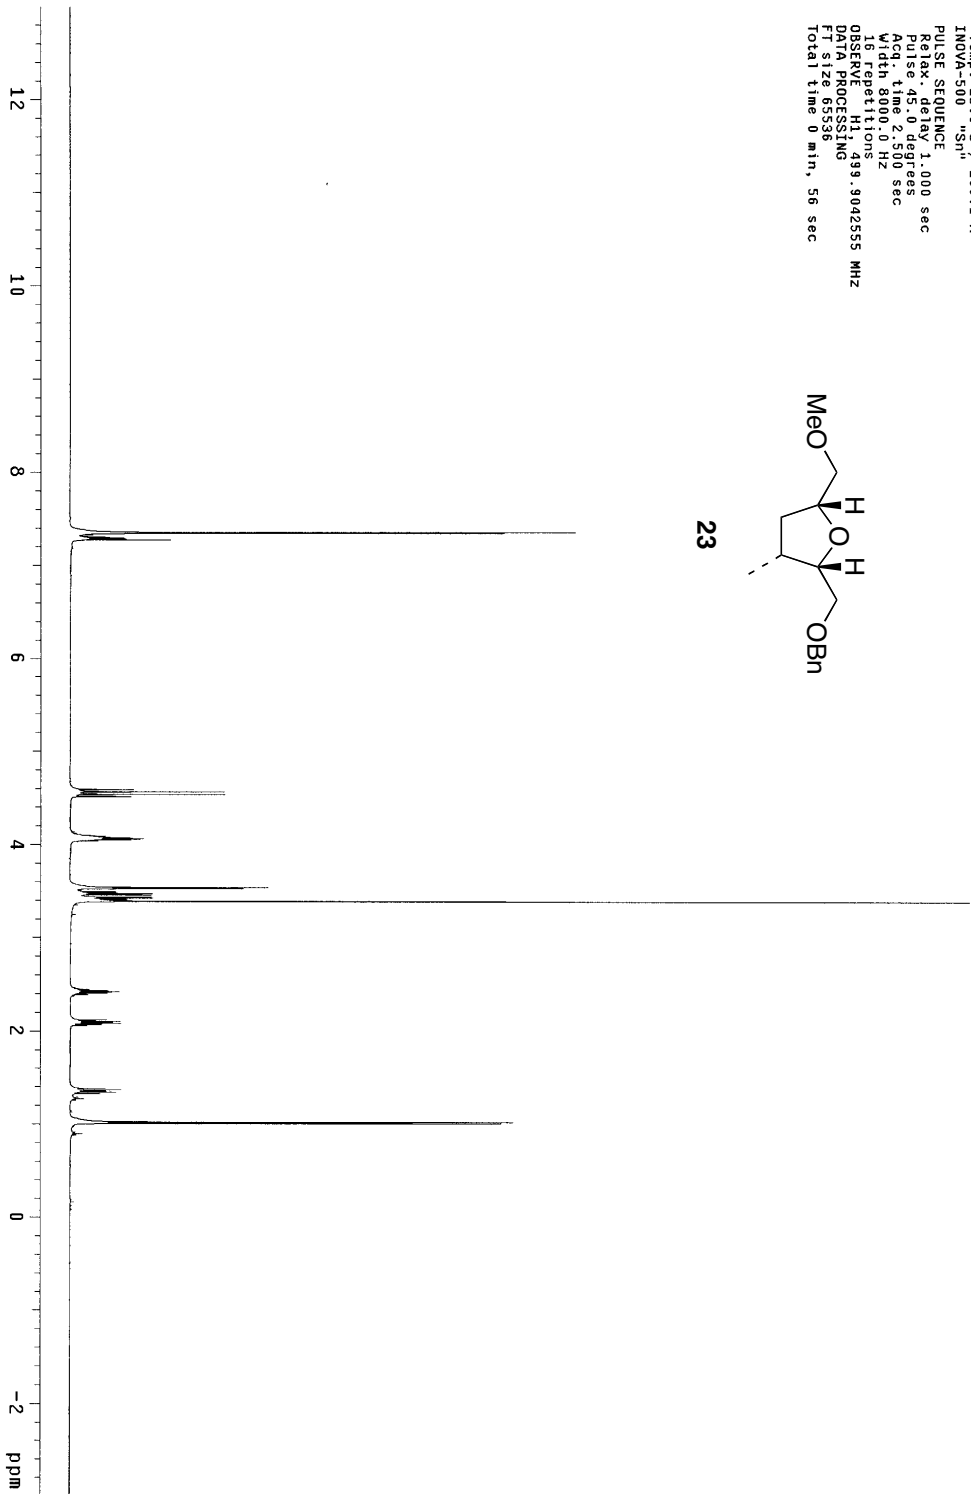

STANDARD 1H OBSERVE

Pulse Sequence: s2pu1  
Solvent: CDCl3  
Ambient temperature  
INOVA-400 "Zr"  
PULSE SEQUENCE  
Pulse 45.0 degrees  
Acq. time 2.666 sec  
Width 6000.6 Hz  
Sweep rate 399.9649645 MHz  
OBSERVE: 1H  
DATA PROCESSING  
Line broadening 0.2 Hz  
FT size 32768  
Total time 0 min, 42 sec

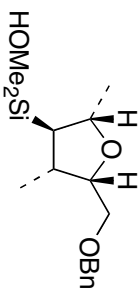

SI-7

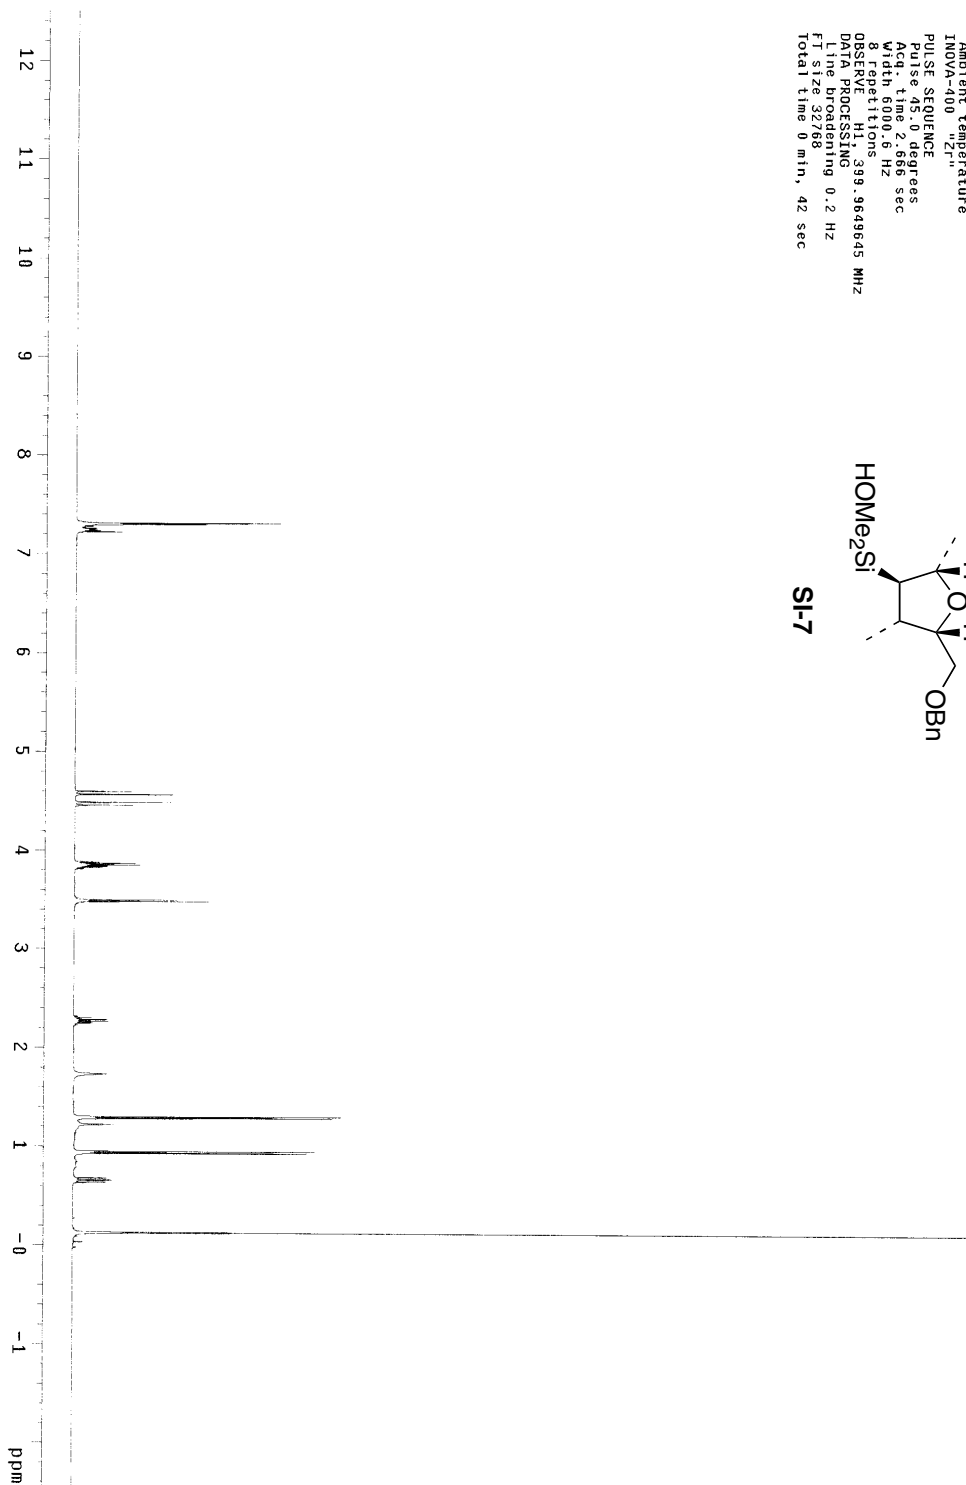

STANDARD 1H OBSERVE

Pulse Sequence: s2pu1

Solvent: CDCl3

Applic: zgpg30

Temperature

INOVA-500 "K"

PULSE SEQUENCE

Pulse 45.0 degrees

Acq. time 2.666 sec

Width 6000.6 Hz

16 repetitions

OBSERVE H1, 399.9649845 MHz

DATA PROCESSING

FT 24.32768

Total time 0 min, 42 sec

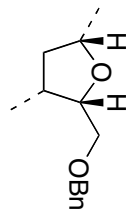

24

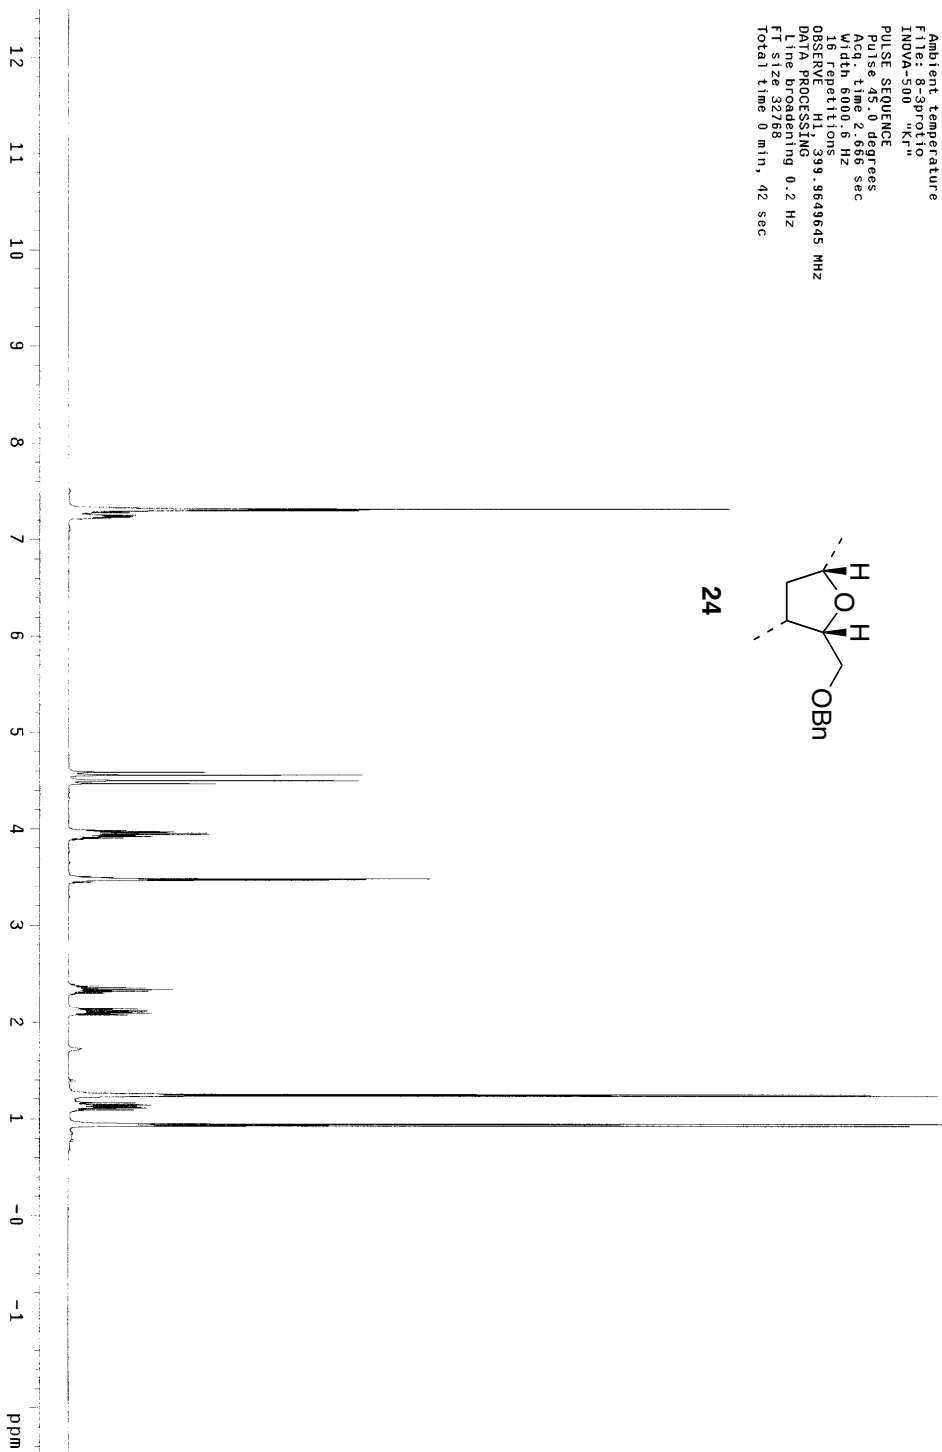

STANDARD 1H OBSERVE

Pulse Sequence: s2pu1  
Solvent: CDCl3  
Ambient temperature  
INDVA-400 "Zr"  
PULSE SEQUENCE  
Pulse 45.0 degrees  
Acq. time 2.666 sec  
8  
P1 den 810.8 Hz  
OBSERVE H1 399.9649645 MHz  
DATA PROCESSING  
Line broadening 0.2 Hz  
FT size 32768  
Total time 0 min, 42 sec

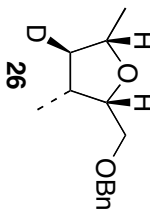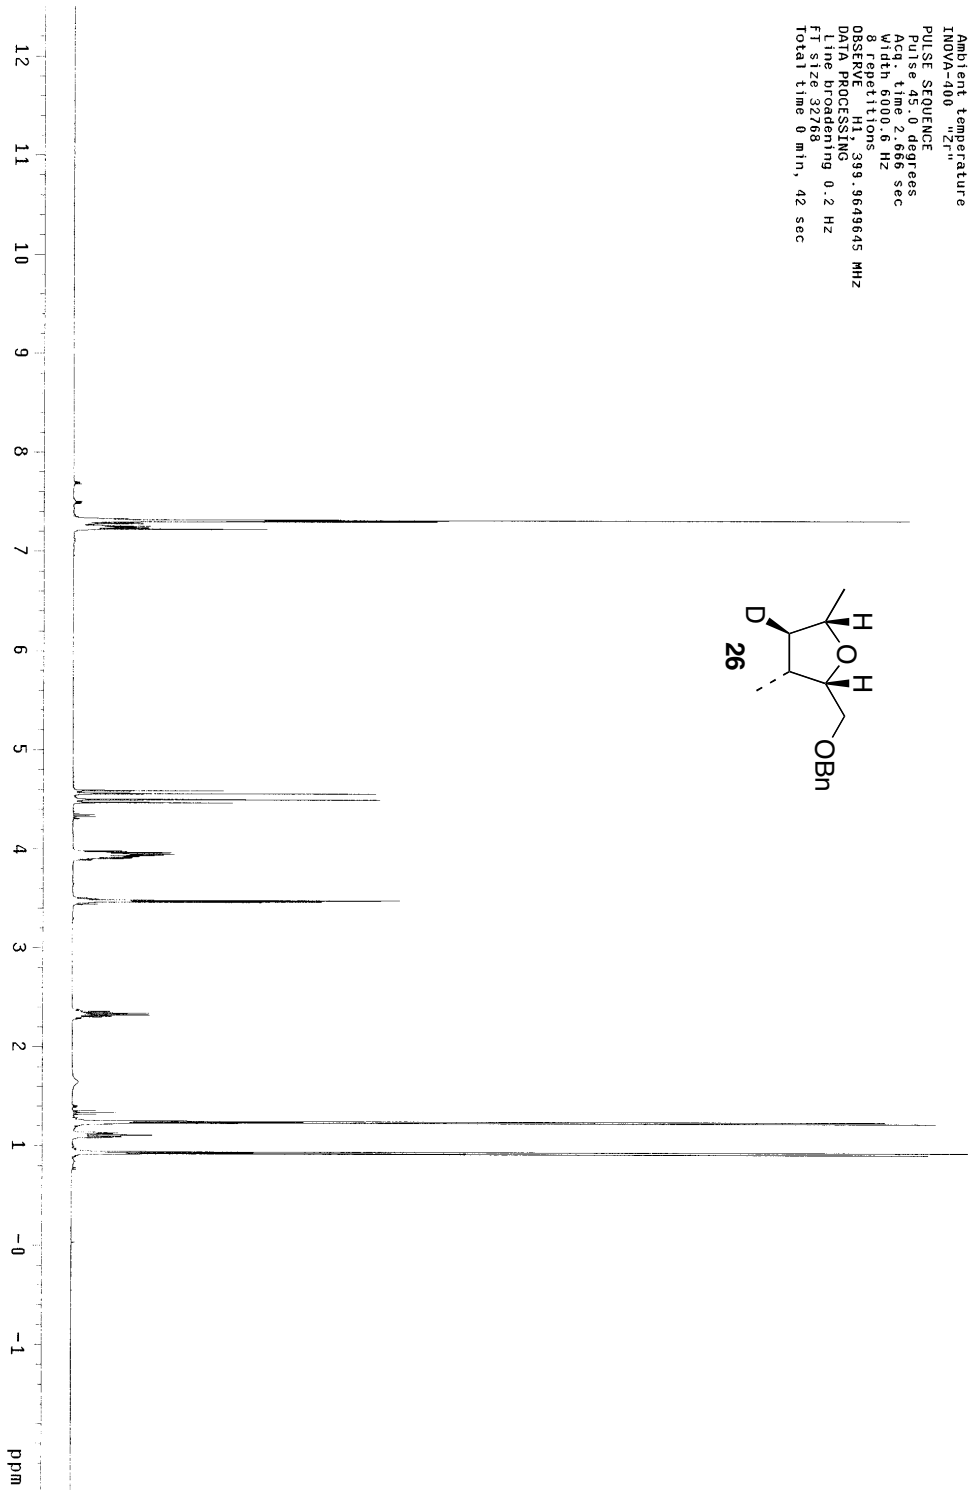

pv-III-31p  
 Pulse Sequence: s2pu1  
 Solvent: CDCl3  
 Ambient temperature  
 INOVA-500 "SN"  
 PULSE SEQUENCE  
 Relax. delay 1.000 sec  
 Pulse 45.0 degrees  
 Acq. time 2.500 sec  
 Width 1297.0 Hz  
 8 Repetitions  
 OBSERVE H1 199.9042605 MHz  
 DATA PROCESSING  
 FT size 65536  
 Total time 0 min, 28 sec

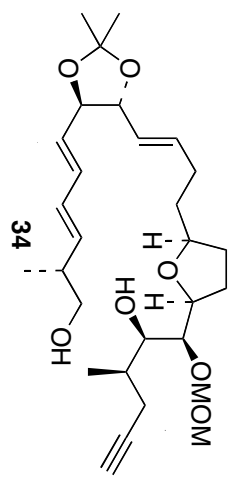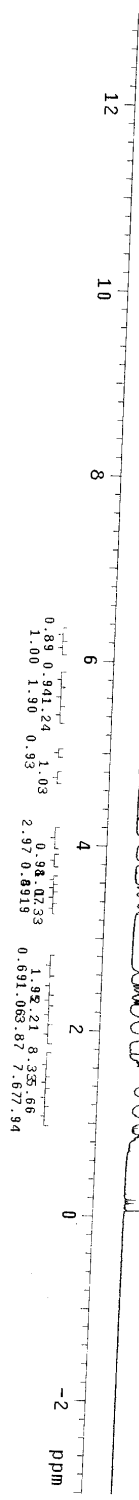

PV-II-175P

Pulse Sequence: s2pul1

Solvent: CDCl3

Acq. Temp: Temperature

INOVA-400

PULSE SEQUENCE

Pulse Seq: s2, degrees

Acq: 172.450 sec

Width: 6000.6 Hz

8 repetitions

OBSERVE: H1, 399.9649487 MHz

DATA PROCESSING

Line Broadening 0.2 Hz

File Size 32788

Total Time 0 min, 21 sec

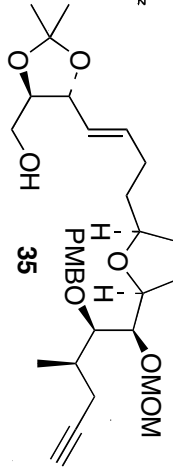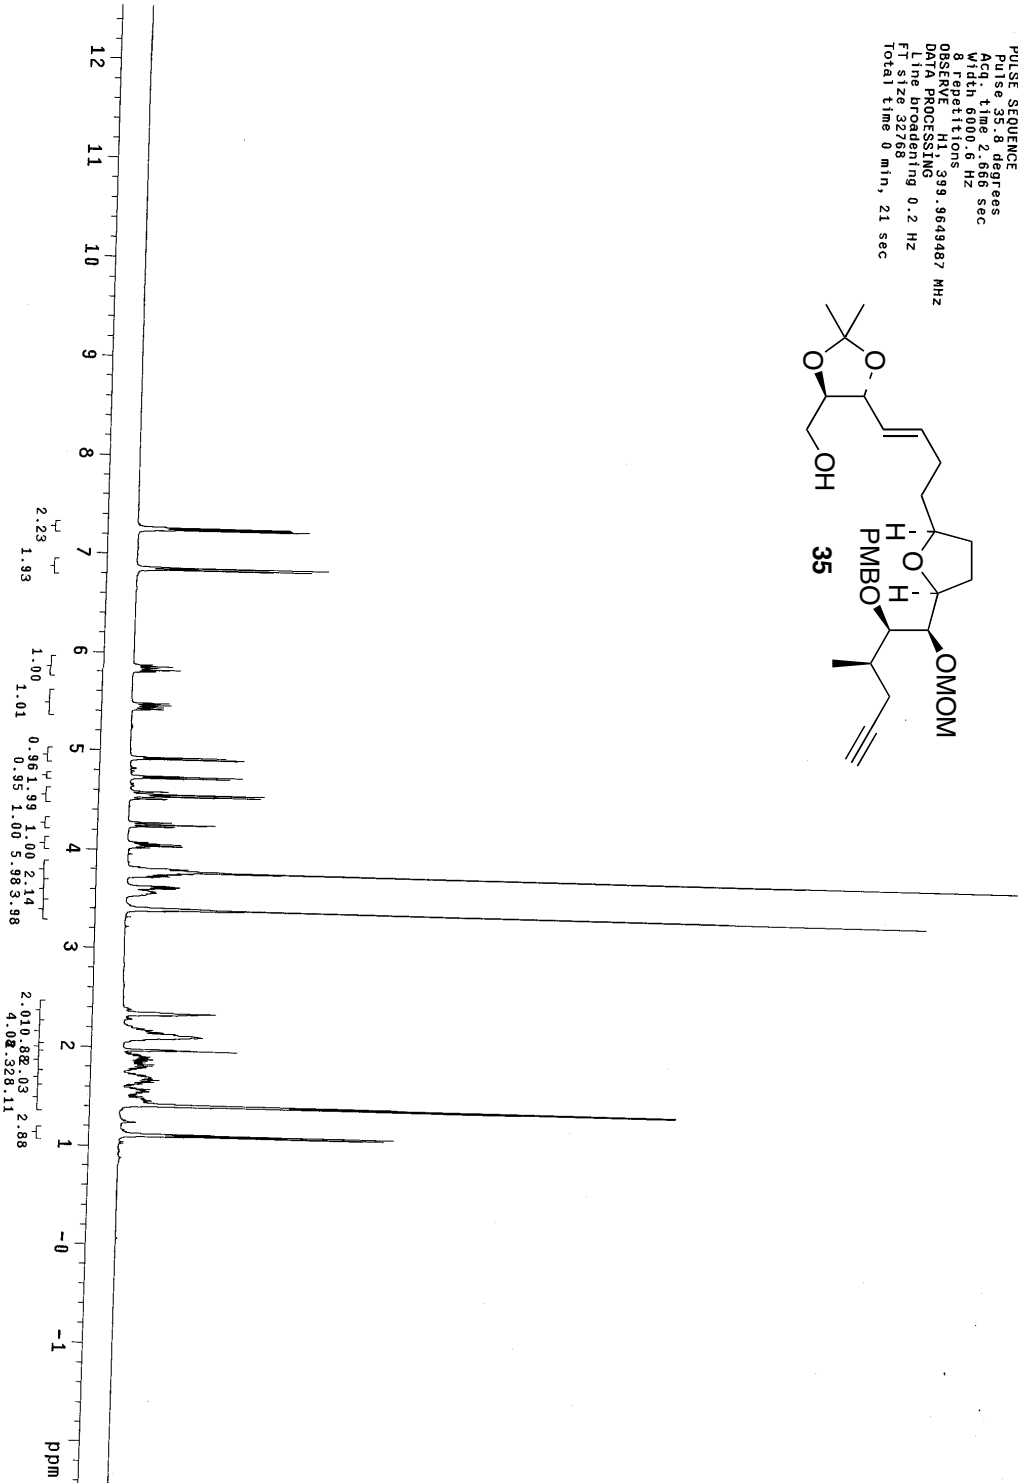

STANDARD 1H OBSERVE

Pulse Sequence: s2pul  
Solvent: CDCl3  
Ambient temperature  
INOVA-400  
"Zr"  
PULSE SEQUENCE  
Pulse 35.0 degrees  
Acq. time 2.656 sec  
Width 6000.6 Hz  
Repetitions 99.9643645 MHz  
Data Processing  
Line broadening 0.2 Hz  
FT size 32768  
Total time 0 min, 42 sec

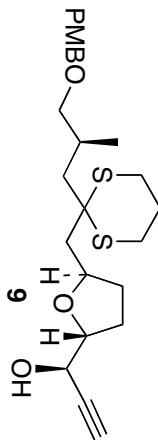

0w 400 MHz

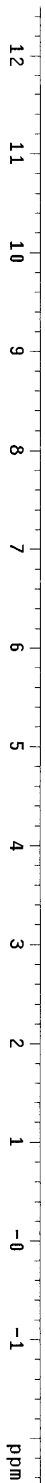

STANDARD PROTON PARAMETERS

Pulse Sequence: szpu1  
Solvent: CDCl3  
Ambient temperature  
File: jbs111-247  
INOVA-500 "K1"  
PULSE SEQUENCE  
Relax. delay 1.000 sec  
Pulse 45.0 degrees  
Acq. time 2.500 sec  
Width 8000.0 Hz  
Spectral width 99.9042555 MHz  
OBSERVED  
DATA PROCESSING  
FT size 65536  
Total time 0 min, 56 sec

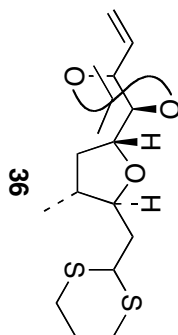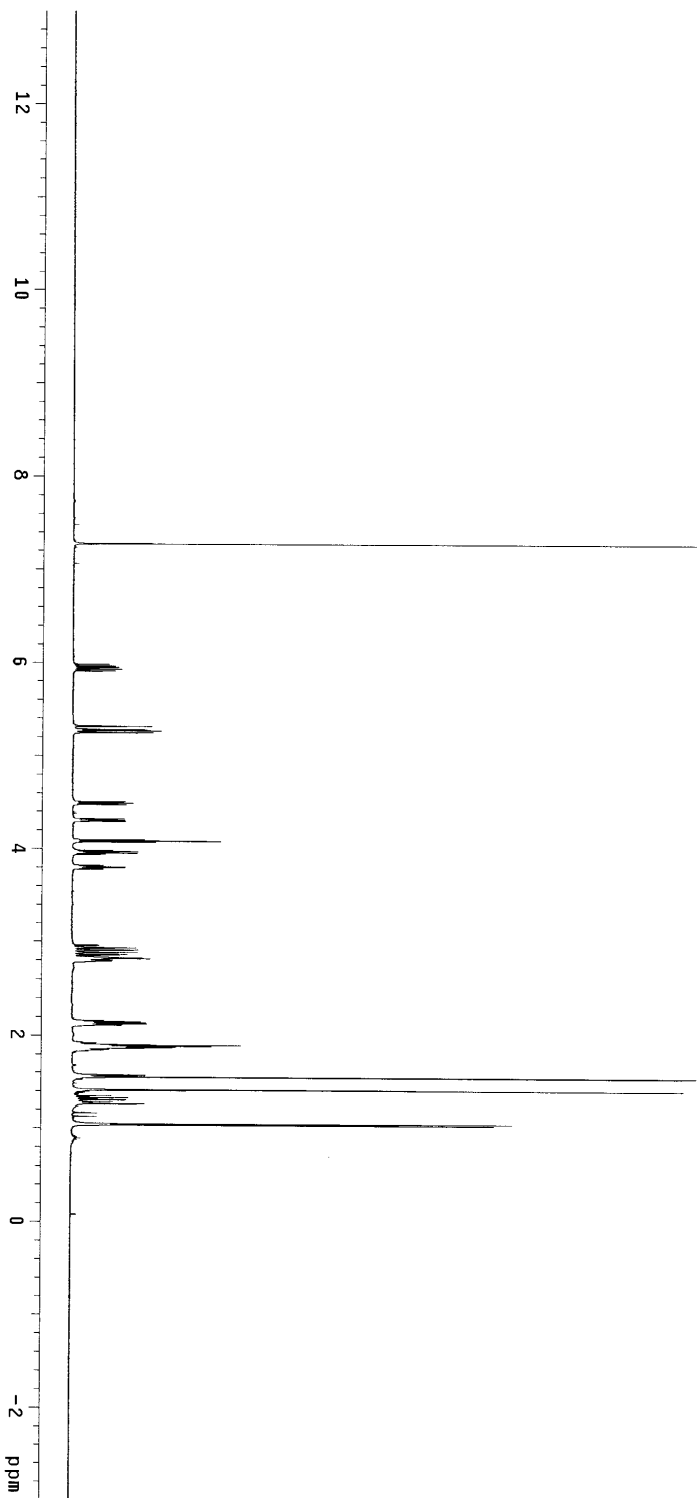



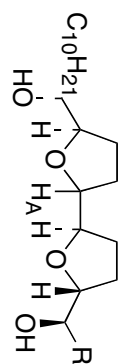

**37**,  $\beta\text{H}_A$ ,  $\text{R} = \text{C}_{10}\text{H}_{21}$

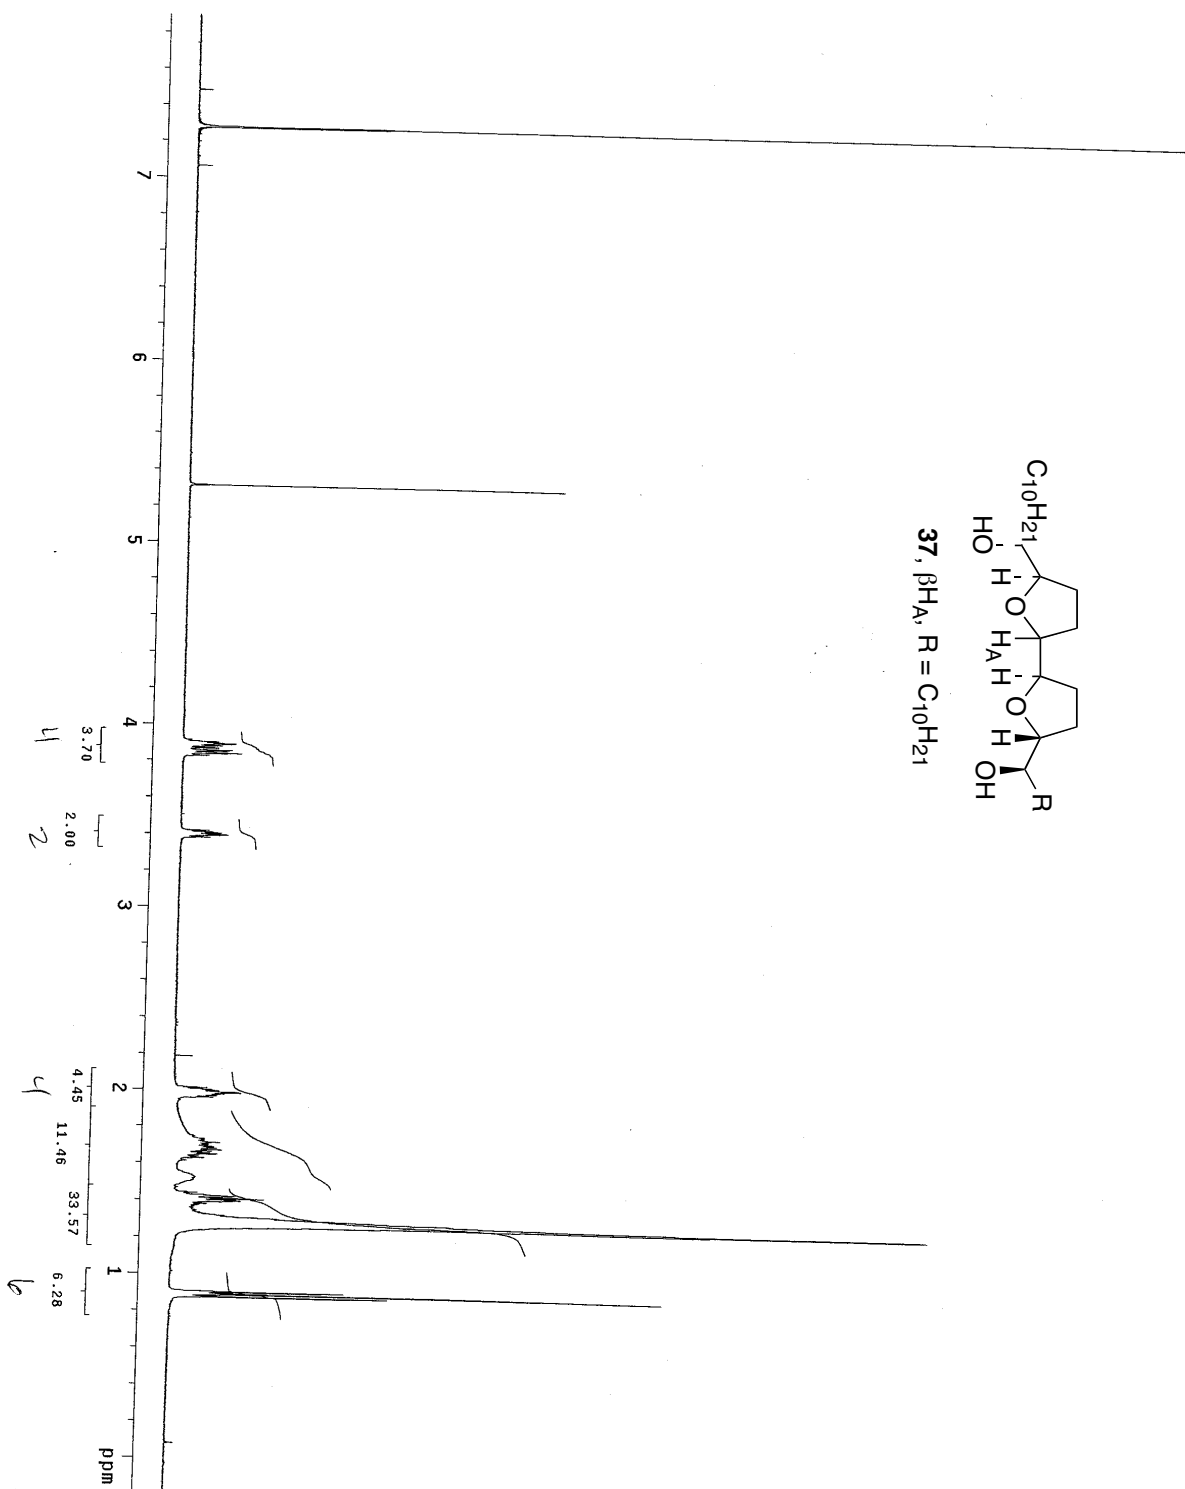

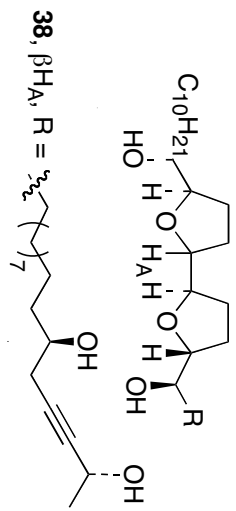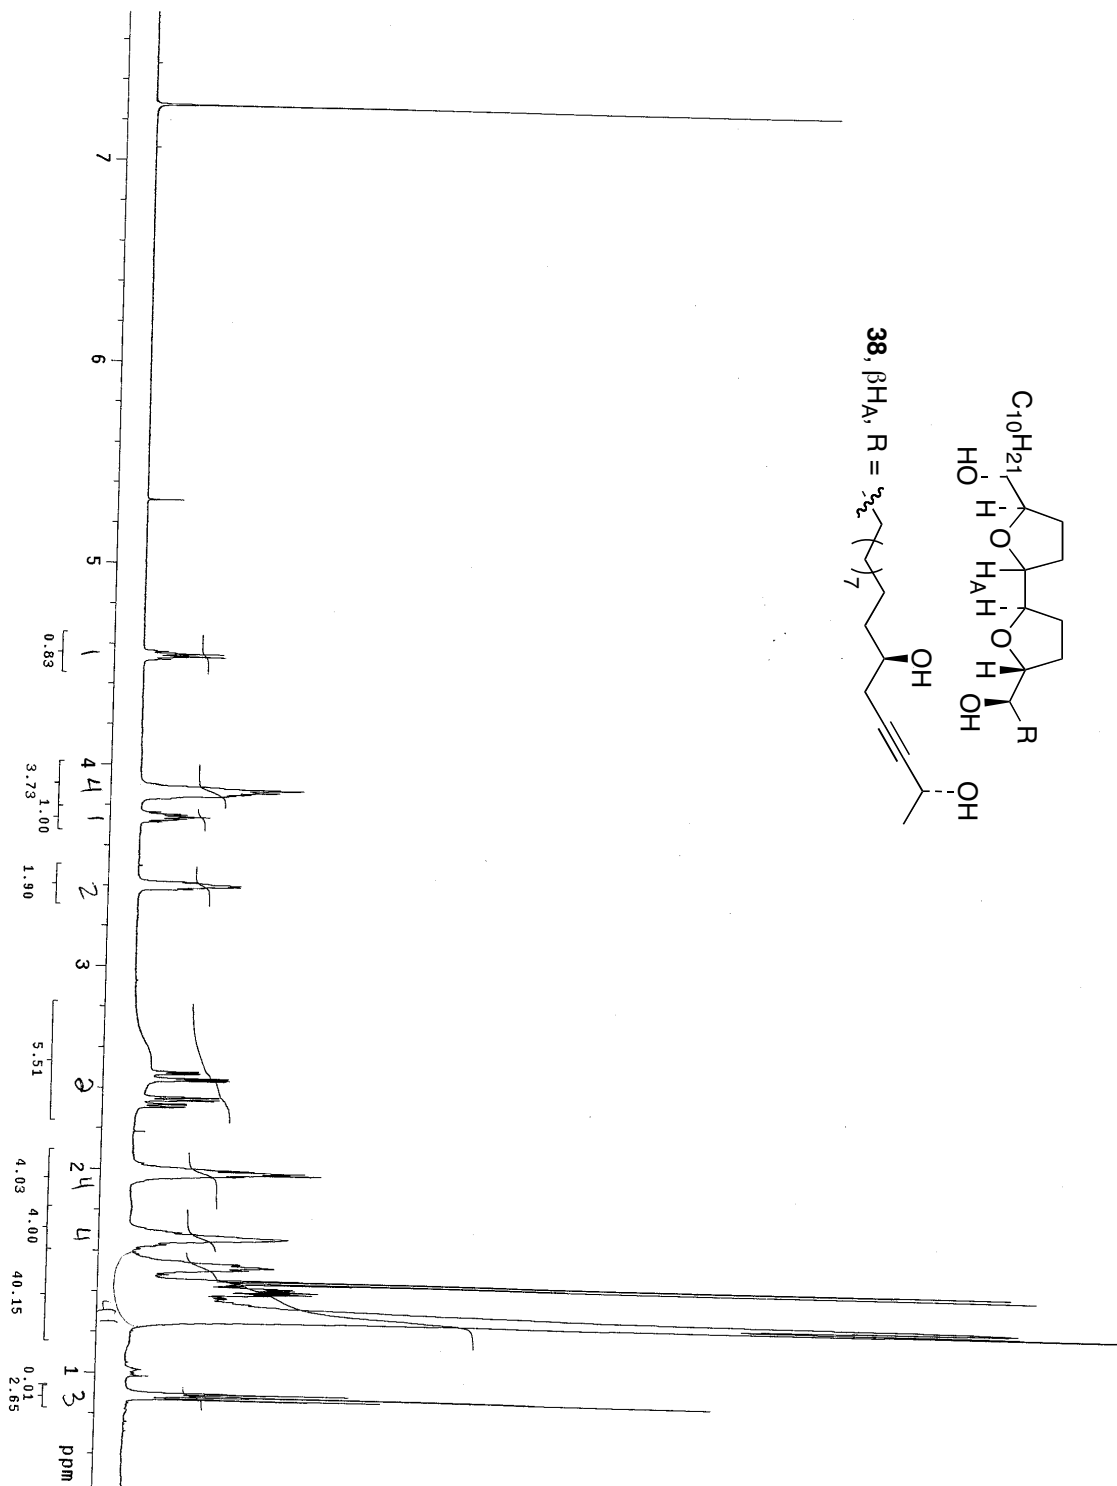

STANDARD PROTON PARAMETERS

```

SAMPLE
date Oct 19 2004      dfrq 499.907
solvent CDCl3         dn
file /export/export-  dprv
/home/mrl244/111     dm
ACQUISITION          dnm
sfrq 499.907         daf 16123
an 2.50             dss 1.0
ap 40000            homo
sw 8000.0           wffile
hd 4000             wffile
tpwr 55             fn
pw 2.7              math
d1f 1.000          uort
n1f 32             wds
ct 32              wnt
clock not used
gain not used
fl1 n
fl2 n
fl3 n
fl4 n
fl5 n
fl6 n
fl7 n
fl8 n
fl9 n
fl10 n
fl11 n
fl12 n
nm cdc ph 2.000
  
```

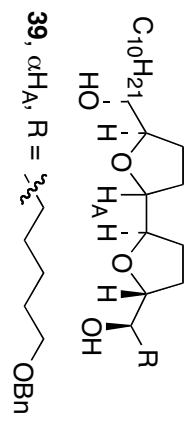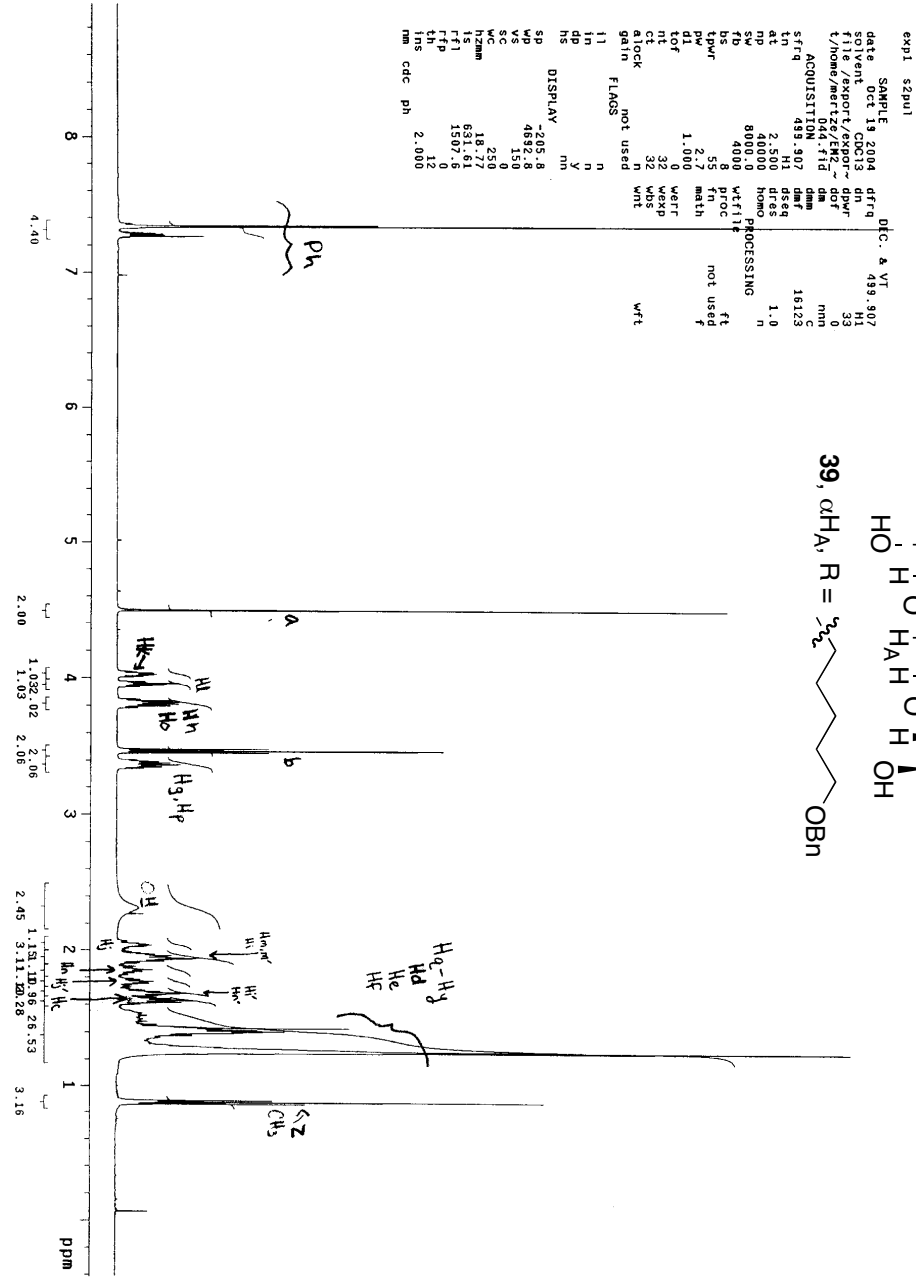

2131-1  
 Pulse Sequence: s2pu1  
 Solvent: CDCl3  
 Ambient temperature  
 File: 2131-2  
 INOVA-500 "C"u"  
 PULSE SEQUENCE  
 Relax delay 1.000 sec  
 Pulse 45.0 degrees  
 Acq. time 2.500 sec  
 Width 8000.0 Hz  
 8 repetitions  
 OBSERVE H1, 499.9042603 MHz  
 DATA PROCESSING  
 F1 size 65536  
 Total time 0 min, 28 sec

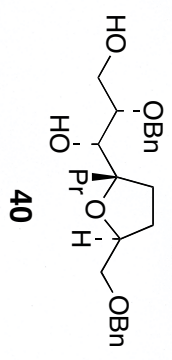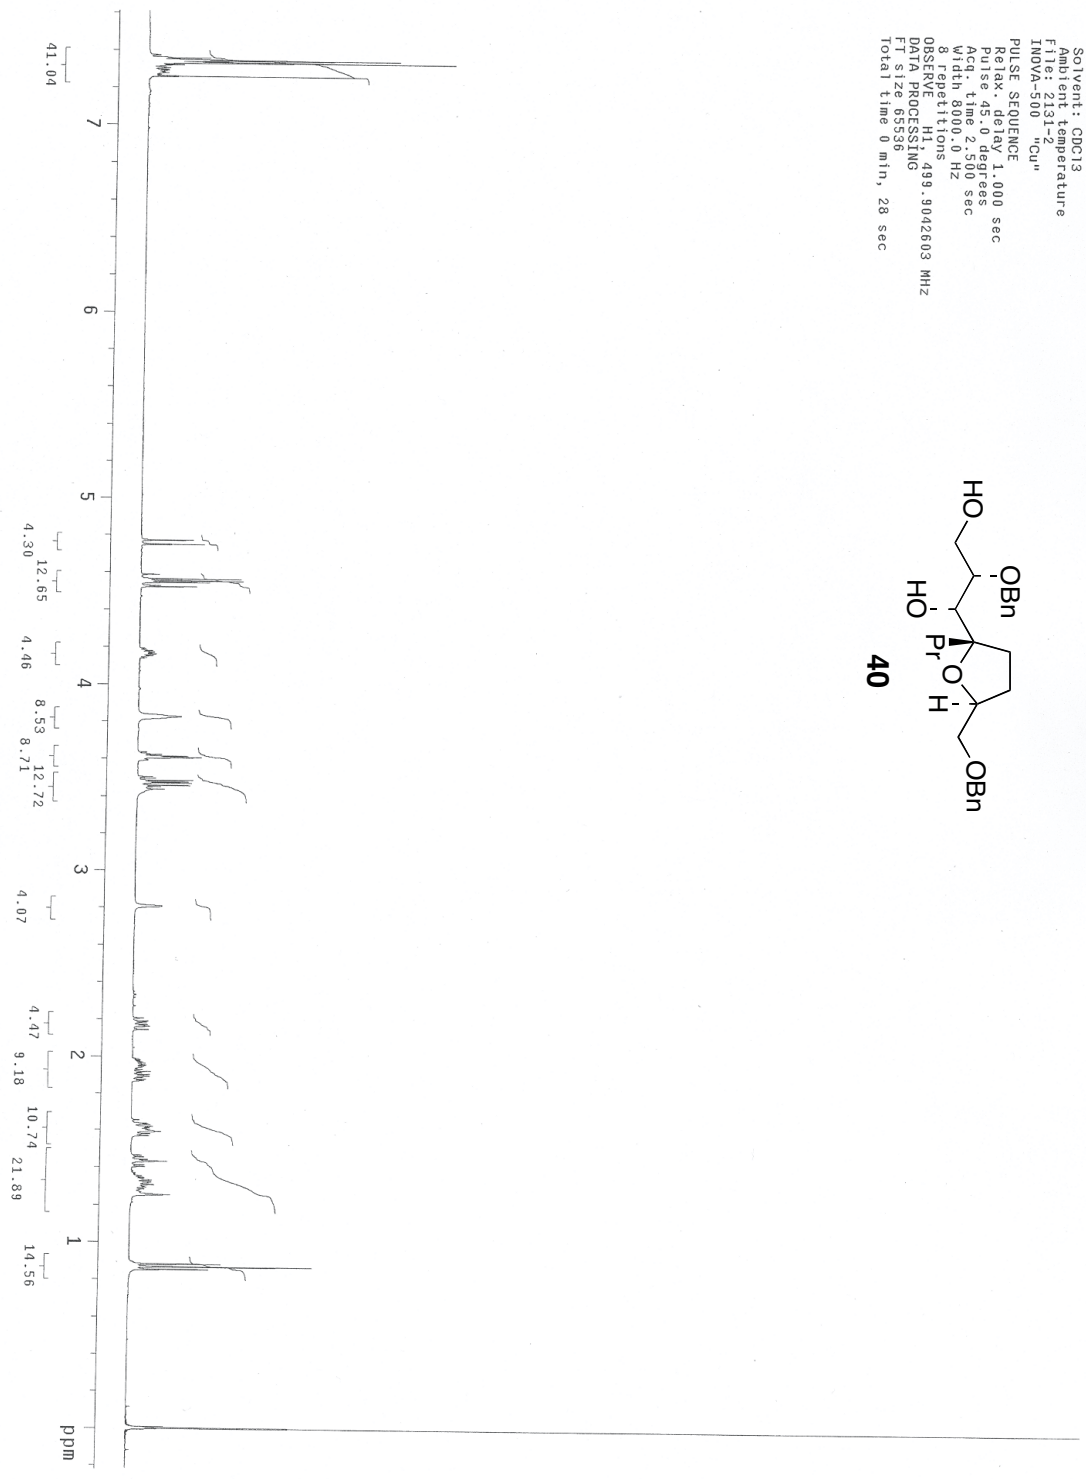

2131-1 after HPLC 11mg  
 Pulse Sequence: s2pu1  
 Solvent: CDCl3  
 Ambient temperature  
 INOVA-500 "Sn"  
 PULSE SEQUENCE  
 Relax: delay 1.000 sec  
 Pulse 45.0 degrees  
 Acq. time 2.500 sec  
 Width 8000.0 Hz  
 8 Repetitions  
 00SRF0004.H1: 499.9042613 MHz  
 D1: 6.128065536  
 FT: 6128065536  
 Total time 0 min, 28 sec

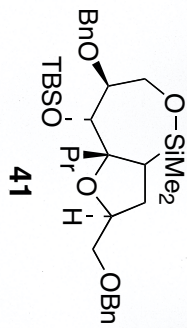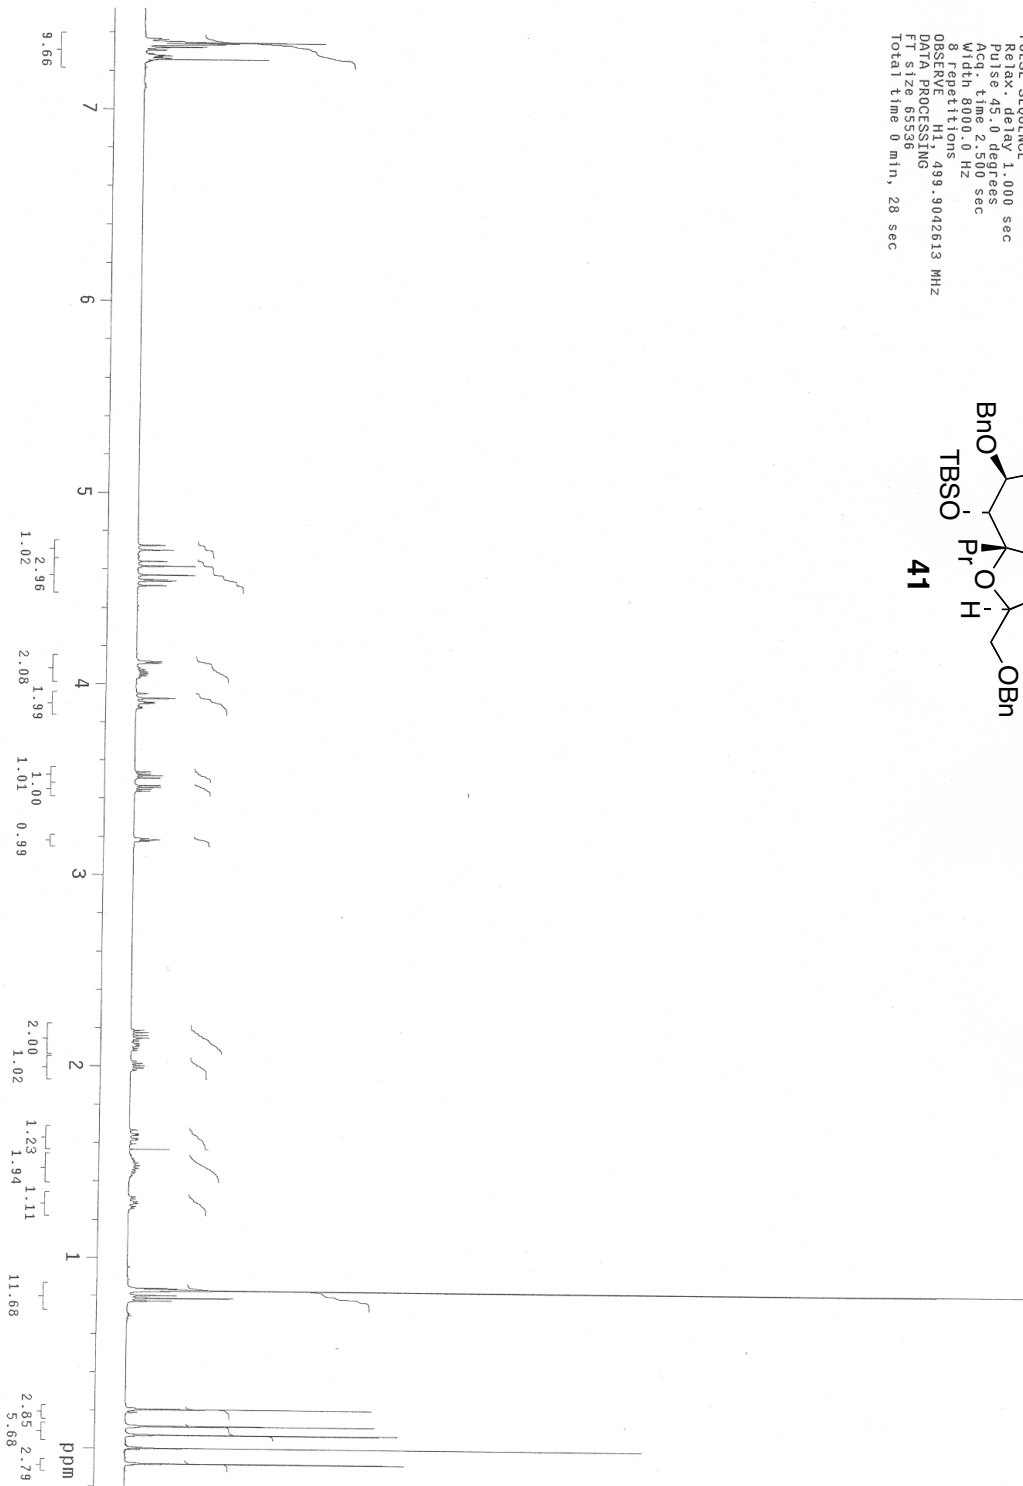

Supplement: NIHMS60226-supplement-SI2.pdf [file NIHMS60226-supplement-SI2.pdf]
